# Supplementary material for: Impact of Query Language on Large Language Model Performance in Dental Trauma Management: A Comparative Evaluation of ChatGPT, Gemini, and Claude
Source: Research Square preprint supplement (doi:10.21203/rs.3.rs-8754479/v1), 2026-02-20
Supplement: Supplementary file 1 [file 0948402e4da77c4c7ee8f353.xlsx]

## Sheet: Summary Statistics
Supplementary Data: Summary Statistics
Model	Language	N	Mean	SD	Median
ChatGPT	English	27	4.856	0.144	4.825
ChatGPT	Turkish	27	4.431	0.191	4.438
Gemini	English	27	4.744	0.364	4.9
Gemini	Turkish	27	4.481	0.42	4.625
Claude	English	27	4.408	0.459	4.538
Claude	Turkish	27	4.409	0.407	4.562

## Sheet: Raw Scoring Data
Complete Raw Scoring Data (n=162)
Model	Language	Scenario	Category	Acc_R1	Acc_R2	Acc_Con	Comp_R1	Comp_R2	Comp_Con	Safe_R1	Safe_R2	Safe_Con	Total_Weighted
ChatGPT	English	1	Komplike olmayan kron kırığı (Mine Kırığı)	5	5	5	5	5	5	5	5	5	5
ChatGPT	English	2	Komplike olmayan kron kırığı (Mine-Dentin Kırığı)	4.5	4.5	4.5	4.5	5	4.75	5	5	5	4.7125
ChatGPT	English	3	Komplike kron kırığı	5	5	5	5	5	5	5	5	5	5
ChatGPT	English	4	Komplike kron kırığı	5	4.5	4.75	4.5	4.5	4.5	5	5	5	4.725
ChatGPT	English	5	Komplike olmayan kron-kök kırığı	5	5	5	5	5	5	5	5	5	5
ChatGPT	English	6	Komplike kron-kök kırığı	5	5	5	4.5	4.5	4.5	5	5	5	4.825
ChatGPT	English	7	Kök kırığı	5	5	5	5	5	5	5	5	5	5
ChatGPT	English	8	Kök kırığı	4.5	5	4.75	4.5	5	4.75	5	5	5	4.8125
ChatGPT	English	9	Kök kırığı	5	5	5	5	5	5	5	5	5	5
ChatGPT	English	10	Kök kırığı	4.5	5	4.75	4.5	4.5	4.5	5	5	5	4.725
ChatGPT	English	11	Alveol Kırığı	5	4.5	4.75	5	5	5	5	5	5	4.9
ChatGPT	English	12	Sarsılma	5	4.5	4.75	4.5	4	4.25	5	5	5	4.6375
ChatGPT	English	13	Sublüksasyon	5	5	5	5	5	5	5	5	5	5
ChatGPT	English	14	Ekstrüsiv Lüksasyon	4.5	5	4.75	4.5	4.5	4.5	5	5	5	4.725
ChatGPT	English	15	Lateral Lüksasyon	5	5	5	5	5	5	5	5	5	5
ChatGPT	English	16	İntrusiv Lüksasyon	4.5	4	4.25	5	5	5	5	5	5	4.7
ChatGPT	English	17	İntrusiv Lüksasyon	5	5	5	5	5	5	5	5	5	5
ChatGPT	English	18	Avülsiyon	5	4.5	4.75	4.5	5	4.75	5	5	5	4.8125
ChatGPT	English	19	Avülsiyon	5	5	5	5	5	5	5	5	5	5
ChatGPT	English	20	Avülsiyon	4.5	5	4.75	4.5	4.5	4.5	5	5	5	4.725
ChatGPT	English	21	Avülsiyon	5	5	5	5	5	5	5	5	5	5
ChatGPT	English	22	Avülsiyon	4.5	4.5	4.5	4.5	4.5	4.5	5	5	5	4.625
ChatGPT	English	23	Avülsiyon	5	5	5	5	5	5	5	5	5	5
ChatGPT	English	24	Avülsiyon	4.5	4.5	4.5	4.5	4.5	4.5	5	5	5	4.625
ChatGPT	English	25	Avülsiyon	5	5	5	5	5	5	5	5	5	5
ChatGPT	English	26	Avülsiyon	5	4.5	4.75	4.5	4.5	4.5	5	5	5	4.725
ChatGPT	English	27	Avülsiyon	5	5	5	4.5	4.5	4.5	5	5	5	4.825
ChatGPT	Turkish	1	Komplike olmayan kron kırığı (Mine Kırığı)	4.5	5	4.75	4.5	4.5	4.5	4.5	4.5	4.5	4.6
ChatGPT	Turkish	2	Komplike olmayan kron kırığı (Mine-Dentin Kırığı)	4.5	4.5	4.5	4	4.5	4.25	4.5	4.5	4.5	4.4125
ChatGPT	Turkish	3	Komplike kron kırığı	4.5	4.5	4.5	4.5	4.5	4.5	5	4.5	4.75	4.5625
ChatGPT	Turkish	4	Komplike kron kırığı	4.5	4.5	4.5	4	4	4	4.5	5	4.75	4.3875
ChatGPT	Turkish	5	Komplike olmayan kron-kök kırığı	4.5	4.5	4.5	4.5	4.5	4.5	5	5	5	4.625
ChatGPT	Turkish	6	Komplike kron-kök kırığı	4	4.5	4.25	4	4	4	4.5	4.5	4.5	4.225
ChatGPT	Turkish	7	Kök kırığı	4.5	4.5	4.5	4.5	5	4.75	5	5	5	4.7125
ChatGPT	Turkish	8	Kök kırığı	4.5	4.5	4.5	4	4	4	5	5	5	4.45
ChatGPT	Turkish	9	Kök kırığı	4.5	4.5	4.5	4.5	4.5	4.5	5	5	5	4.625
ChatGPT	Turkish	10	Kök kırığı	4	4	4	4	4	4	4.5	4.5	4.5	4.125
ChatGPT	Turkish	11	Alveol Kırığı	4.5	4.5	4.5	4.5	4.5	4.5	5	5	5	4.625
ChatGPT	Turkish	12	Sarsılma	4	4	4	4	4.5	4.25	4.5	4.5	4.5	4.2125
ChatGPT	Turkish	13	Sublüksasyon	4.5	4.5	4.5	4.5	4.5	4.5	4	4.5	4.25	4.4375
ChatGPT	Turkish	14	Ekstrüsiv Lüksasyon	5	4.5	4.75	4	4	4	4.5	4.5	4.5	4.425
ChatGPT	Turkish	15	Lateral Lüksasyon	4.5	4.5	4.5	4.5	4.5	4.5	5.5	4	4.75	4.5625
ChatGPT	Turkish	16	İntrusiv Lüksasyon	4	4	4	4	4	4	4.5	4.5	4.5	4.125
ChatGPT	Turkish	17	İntrusiv Lüksasyon	5	4.5	4.75	4.5	4	4.25	4.5	4.5	4.5	4.5125
ChatGPT	Turkish	18	Avülsiyon	5	4.5	4.75	4	4	4	4.5	4.5	4.5	4.425
ChatGPT	Turkish	19	Avülsiyon	4.5	4.5	4.5	4.5	4.5	4.5	4	4.5	4.25	4.4375
ChatGPT	Turkish	20	Avülsiyon	4	4	4	4	4	4	4.5	4.5	4.5	4.125
ChatGPT	Turkish	21	Avülsiyon	4.5	4.5	4.5	4.5	4.5	4.5	4.5	5	4.75	4.5625
ChatGPT	Turkish	22	Avülsiyon	4	4.5	4.25	4	4	4	4.5	4.5	4.5	4.225
ChatGPT	Turkish	23	Avülsiyon	5	5	5	4.5	4.5	4.5	4.5	4	4.25	4.6375
ChatGPT	Turkish	24	Avülsiyon	4.5	4	4.25	4	4	4	4.5	4.5	4.5	4.225
ChatGPT	Turkish	25	Avülsiyon	4.5	4.5	4.5	4.5	4.5	4.5	5	5	5	4.625
ChatGPT	Turkish	26	Avülsiyon	4	4	4	4	4	4	4.5	4.5	4.5	4.125
ChatGPT	Turkish	27	Avülsiyon	4.5	4.5	4.5	4.5	4.5	4.5	5	5	5	4.625
Gemini	English	1	Komplike olmayan kron kırığı (Mine Kırığı)	5	4	4.5	4.5	4.5	4.5	5	5	5	4.625
Gemini	English	2	Komplike olmayan kron kırığı (Mine-Dentin Kırığı)	4	4.5	4.25	4	4	4	5	5	5	4.35
Gemini	English	3	Komplike kron kırığı	3.5	4.5	4	4	4	4	4	4	4	4
Gemini	English	4	Komplike kron kırığı	3.5	3.5	3.5	4.5	5	4.75	4	4	4	4.0625
Gemini	English	5	Komplike olmayan kron-kök kırığı	4	4.5	4.25	5	4.5	4.75	5	5	5	4.6125
Gemini	English	6	Komplike kron-kök kırığı	3	3	3	3.5	4	3.75	4.5	5	4.75	3.7
Gemini	English	7	Kök kırığı	5	5	5	5	5	5	5	5	5	5
Gemini	English	8	Kök kırığı	5	5	5	4.5	4.5	4.5	4	5	4.5	4.7
Gemini	English	9	Kök kırığı	5	5	5	5	5	5	5	5	5	5
Gemini	English	10	Kök kırığı	4.5	4.5	4.5	5	5	5	5	5	5	4.8
Gemini	English	11	Alveol Kırığı	5	5	5	4.5	5	4.75	5	5	5	4.9125
Gemini	English	12	Sarsılma	5	5	5	4.5	4.5	4.5	5	5	5	4.825
Gemini	English	13	Sublüksasyon	5	5	5	5	5	5	5	5	5	5
Gemini	English	14	Ekstrüsiv Lüksasyon	5	5	5	5	5	5	5	5	5	5
Gemini	English	15	Lateral Lüksasyon	5	4.5	4.75	5	5	5	5	5	5	4.9
Gemini	English	16	İntrusiv Lüksasyon	4.5	5	4.75	5	5	5	5	5	5	4.9
Gemini	English	17	İntrusiv Lüksasyon	5	5	5	5	5	5	5	5	5	5
Gemini	English	18	Avülsiyon	5	5	5	5	5	5	5	5	5	5
Gemini	English	19	Avülsiyon	5	5	5	5	5	5	5	5	5	5
Gemini	English	20	Avülsiyon	4.5	5	4.75	5	5	5	5	5	5	4.9
Gemini	English	21	Avülsiyon	5	5	5	4.5	5	4.75	5	5	5	4.9125
Gemini	English	22	Avülsiyon	5	4.5	4.75	4.5	5	4.75	5	5	5	4.8125
Gemini	English	23	Avülsiyon	5	5	5	5	5	5	5	5	5	5
Gemini	English	24	Avülsiyon	5	4.5	4.75	5	5	5	5	5	5	4.9
Gemini	English	25	Avülsiyon	5	5	5	5	5	5	5	5	5	5
Gemini	English	26	Avülsiyon	4	4	4	4.5	4.5	4.5	4	4	4	4.175
Gemini	English	27	Avülsiyon	5	5	5	5	5	5	5	5	5	5
Gemini	Turkish	1	Komplike olmayan kron kırığı (Mine Kırığı)	5	4	4.5	4	4.5	4.25	5	5	5	4.5375
Gemini	Turkish	2	Komplike olmayan kron kırığı (Mine-Dentin Kırığı)	4.5	4.5	4.5	4.5	4.5	4.5	5	5	5	4.625
Gemini	Turkish	3	Komplike kron kırığı	4	3.5	3.75	3.5	3.5	3.5	4	3.5	3.75	3.6625
Gemini	Turkish	4	Komplike kron kırığı	3	2.5	2.75	3.5	3.5	3.5	4	4.5	4.25	3.3875
Gemini	Turkish	5	Komplike olmayan kron-kök kırığı	4	4	4	4	4	4	4.5	4.5	4.5	4.125
Gemini	Turkish	6	Komplike kron-kök kırığı	5	4.5	4.75	4.5	5	4.75	5	5	5	4.8125
Gemini	Turkish	7	Kök kırığı	4.5	4.5	4.5	4.5	4	4.25	5	5	5	4.5375
Gemini	Turkish	8	Kök kırığı	3.5	3.5	3.5	3.5	4	3.75	4.5	4.5	4.5	3.8375
Gemini	Turkish	9	Kök kırığı	4.5	4.5	4.5	4.5	4.5	4.5	5	5	5	4.625
Gemini	Turkish	10	Kök kırığı	5	5	5	4.5	4.5	4.5	5	5	5	4.825
Gemini	Turkish	11	Alveol Kırığı	5	4.5	4.75	4.5	5	4.75	5	5	5	4.8125
Gemini	Turkish	12	Sarsılma	4.5	4.5	4.5	4.5	4.5	4.5	5	5	5	4.625
Gemini	Turkish	13	Sublüksasyon	4	4	4	4	4	4	4.5	5	4.75	4.1875
Gemini	Turkish	14	Ekstrüsiv Lüksasyon	5	4.5	4.75	4.5	4.5	4.5	5	5	5	4.725
Gemini	Turkish	15	Lateral Lüksasyon	4.5	4.5	4.5	4.5	4.5	4.5	5	5	5	4.625
Gemini	Turkish	16	İntrusiv Lüksasyon	4.5	5	4.75	4	4	4	5	4.5	4.75	4.4875
Gemini	Turkish	17	İntrusiv Lüksasyon	4.5	4.5	4.5	5	4.5	4.75	5	5	5	4.7125
Gemini	Turkish	18	Avülsiyon	4.5	4.5	4.5	4	4	4	4.5	4	4.25	4.2625
Gemini	Turkish	19	Avülsiyon	4.5	4.5	4.5	4.5	4.5	4.5	4.5	4.5	4.5	4.5
Gemini	Turkish	20	Avülsiyon	5	4.5	4.75	4.5	5	4.75	5	5	5	4.8125
Gemini	Turkish	21	Avülsiyon	4.5	5	4.75	5	4.5	4.75	5	5	5	4.8125
Gemini	Turkish	22	Avülsiyon	4	3.5	3.75	3.5	4	3.75	4	4.5	4.25	3.875
Gemini	Turkish	23	Avülsiyon	4	4	4	3.5	4	3.75	4.5	4.5	4.5	4.0375
Gemini	Turkish	24	Avülsiyon	5	5	5	4.5	4.5	4.5	5	5	5	4.825
Gemini	Turkish	25	Avülsiyon	5	4.5	4.75	4.5	4.5	4.5	5	5	5	4.725
Gemini	Turkish	26	Avülsiyon	5	5	5	5	5	5	5	5	5	5
Gemini	Turkish	27	Avülsiyon	5	5	5	5	5	5	5	5	5	5
Claude	English	1	Komplike olmayan kron kırığı (Mine Kırığı)	4	4	4	3.5	4	3.75	5	5	5	4.1625
Claude	English	2	Komplike olmayan kron kırığı (Mine-Dentin Kırığı)	4.5	5	4.75	4	4.5	4.25	5	5	5	4.6375
Claude	English	3	Komplike kron kırığı	2.5	2.5	2.5	3	2.5	2.75	3.5	3.5	3.5	2.8375
Claude	English	4	Komplike kron kırığı	3.5	3.5	3.5	4	4	4	3.5	4	3.75	3.7375
Claude	English	5	Komplike olmayan kron-kök kırığı	4	4	4	4	4	4	4	5	4.5	4.125
Claude	English	6	Komplike kron-kök kırığı	3.5	3.5	3.5	3.5	3.5	3.5	5	4.5	4.75	3.8125
Claude	English	7	Kök kırığı	4.5	5	4.75	4.5	4.5	4.5	5	5	5	4.725
Claude	English	8	Kök kırığı	4	4	4	4	3	3.5	4.5	4.5	4.5	3.95
Claude	English	9	Kök kırığı	4	4	4	4.5	4.5	4.5	5	5	5	4.425
Claude	English	10	Kök kırığı	5	4.5	4.75	4.5	4.5	4.5	5	5	5	4.725
Claude	English	11	Alveol Kırığı	5	5	5	4.5	4.5	4.5	5	5	5	4.825
Claude	English	12	Sarsılma	4.5	4.5	4.5	4.5	4.5	4.5	5	5	5	4.625
Claude	English	13	Sublüksasyon	3.5	4	3.75	4	4	4	5	5	5	4.15
Claude	English	14	Ekstrüsiv Lüksasyon	4.5	4.5	4.5	4.5	4.5	4.5	5	5	5	4.625
Claude	English	15	Lateral Lüksasyon	4.5	4.5	4.5	4.5	5	4.75	5	5	5	4.7125
Claude	English	16	İntrusiv Lüksasyon	4.5	3.5	4	4.5	4.5	4.5	4.5	5	4.75	4.3625
Claude	English	17	İntrusiv Lüksasyon	4	4.5	4.25	4.5	4	4.25	5	5	5	4.4375
Claude	English	18	Avülsiyon	4.5	5	4.75	4	4	4	4.5	5	4.75	4.4875
Claude	English	19	Avülsiyon	5	4.5	4.75	4.5	4.5	4.5	5	5	5	4.725
Claude	English	20	Avülsiyon	4.5	4.5	4.5	5	5	5	5	5	5	4.8
Claude	English	21	Avülsiyon	4.5	4.5	4.5	4	4.5	4.25	5	5	5	4.5375
Claude	English	22	Avülsiyon	4	4	4	4	4	4	4.5	4.5	4.5	4.125
Claude	English	23	Avülsiyon	4	4	4	4	4.5	4.25	4.5	4.5	4.5	4.2125
Claude	English	24	Avülsiyon	5	5	5	4.5	4.5	4.5	5	5	5	4.825
Claude	English	25	Avülsiyon	4	5	4.5	4	4.5	4.25	5	5	5	4.5375
Claude	English	26	Avülsiyon	5	5	5	5	5	5	5	5	5	5
Claude	English	27	Avülsiyon	5	4.5	4.75	5	5	5	5	5	5	4.9
Claude	Turkish	1	Komplike olmayan kron kırığı (Mine Kırığı)	3.5	3	3.25	3.5	3.5	3.5	4.5	4.5	4.5	3.65
Claude	Turkish	2	Komplike olmayan kron kırığı (Mine-Dentin Kırığı)	4.5	4.5	4.5	4.5	4.5	4.5	5	5	5	4.625
Claude	Turkish	3	Komplike kron kırığı	5	5	5	4.5	4	4.25	5	5	5	4.7375
Claude	Turkish	4	Komplike kron kırığı	4.5	5	4.75	4.5	4.5	4.5	5	5	5	4.725
Claude	Turkish	5	Komplike olmayan kron-kök kırığı	4	3.5	3.75	4	4	4	4.5	4.5	4.5	4.025
Claude	Turkish	6	Komplike kron-kök kırığı	4	4	4	3.5	3.5	3.5	5	4.5	4.75	4.0125
Claude	Turkish	7	Kök kırığı	4.5	4.5	4.5	4.5	4	4.25	5	5	5	4.5375
Claude	Turkish	8	Kök kırığı	4	4	4	3.5	3	3.25	4.5	4.5	4.5	3.8625
Claude	Turkish	9	Kök kırığı	4.5	5	4.75	4.5	4	4.25	5	5	5	4.6375
Claude	Turkish	10	Kök kırığı	4.5	4.5	4.5	4.5	4.5	4.5	5	5	5	4.625
Claude	Turkish	11	Alveol Kırığı	5	4	4.5	5	4.5	4.75	5	5	5	4.7125
Claude	Turkish	12	Sarsılma	4.5	4.5	4.5	4.5	4.5	4.5	5	4.5	4.75	4.5625
Claude	Turkish	13	Sublüksasyon	3.5	3.5	3.5	4	4	4	5	5	5	4.05
Claude	Turkish	14	Ekstrüsiv Lüksasyon	4.5	4	4.25	4.5	4.5	4.5	5	5	5	4.525
Claude	Turkish	15	Lateral Lüksasyon	4.5	4.5	4.5	4.5	5	4.75	5	4.5	4.75	4.65
Claude	Turkish	16	İntrusiv Lüksasyon	3	3	3	3.5	3.5	3.5	3.5	3.5	3.5	3.3
Claude	Turkish	17	İntrusiv Lüksasyon	4.5	5	4.75	4.5	4.5	4.5	5	5	5	4.725
Claude	Turkish	18	Avülsiyon	4	4	4	4.5	4	4.25	4	4	4	4.0875
Claude	Turkish	19	Avülsiyon	5	4.5	4.75	3.5	4	3.75	5	5	5	4.4625
Claude	Turkish	20	Avülsiyon	5	4.5	4.75	4.5	4.5	4.5	5	5	5	4.725
Claude	Turkish	21	Avülsiyon	4.5	4.5	4.5	5	4.5	4.75	5	5	5	4.7125
Claude	Turkish	22	Avülsiyon	4	4	4	4	4	4	4.5	5	4.75	4.1875
Claude	Turkish	23	Avülsiyon	4	3.5	3.75	4	4	4	4.5	5	4.75	4.0875
Claude	Turkish	24	Avülsiyon	4.5	4.5	4.5	4.5	4.5	4.5	5	5	5	4.625
Claude	Turkish	25	Avülsiyon	4.5	4	4.25	4	4	4	4.5	5	4.75	4.2875
Claude	Turkish	26	Avülsiyon	5	5	5	5	4.5	4.75	5	5	5	4.9125
Claude	Turkish	27	Avülsiyon	5	5	5	5	5	5	5	5	5	5

## Sheet: ChatGPT
ChatGPT - Detailed Scores
Scenario	Language	Category	Acc_R1	Acc_R2	Acc_Con	Comp_R1	Comp_R2	Comp_Con	Safe_R1	Safe_R2	Safe_Con	Total
1	English	Komplike olmayan kron kırığı (Mine Kırığı)	5	5	5	5	5	5	5	5	5	5
1	Turkish	Komplike olmayan kron kırığı (Mine Kırığı)	4.5	5	4.75	4.5	4.5	4.5	4.5	4.5	4.5	4.6
2	English	Komplike olmayan kron kırığı (Mine-Dentin Kırığı)	4.5	4.5	4.5	4.5	5	4.75	5	5	5	4.7125
2	Turkish	Komplike olmayan kron kırığı (Mine-Dentin Kırığı)	4.5	4.5	4.5	4	4.5	4.25	4.5	4.5	4.5	4.4125
3	English	Komplike kron kırığı	5	5	5	5	5	5	5	5	5	5
3	Turkish	Komplike kron kırığı	4.5	4.5	4.5	4.5	4.5	4.5	5	4.5	4.75	4.5625
4	English	Komplike kron kırığı	5	4.5	4.75	4.5	4.5	4.5	5	5	5	4.725
4	Turkish	Komplike kron kırığı	4.5	4.5	4.5	4	4	4	4.5	5	4.75	4.3875
5	English	Komplike olmayan kron-kök kırığı	5	5	5	5	5	5	5	5	5	5
5	Turkish	Komplike olmayan kron-kök kırığı	4.5	4.5	4.5	4.5	4.5	4.5	5	5	5	4.625
6	English	Komplike kron-kök kırığı	5	5	5	4.5	4.5	4.5	5	5	5	4.825
6	Turkish	Komplike kron-kök kırığı	4	4.5	4.25	4	4	4	4.5	4.5	4.5	4.225
7	English	Kök kırığı	5	5	5	5	5	5	5	5	5	5
7	Turkish	Kök kırığı	4.5	4.5	4.5	4.5	5	4.75	5	5	5	4.7125
8	English	Kök kırığı	4.5	5	4.75	4.5	5	4.75	5	5	5	4.8125
8	Turkish	Kök kırığı	4.5	4.5	4.5	4	4	4	5	5	5	4.45
9	English	Kök kırığı	5	5	5	5	5	5	5	5	5	5
9	Turkish	Kök kırığı	4.5	4.5	4.5	4.5	4.5	4.5	5	5	5	4.625
10	English	Kök kırığı	4.5	5	4.75	4.5	4.5	4.5	5	5	5	4.725
10	Turkish	Kök kırığı	4	4	4	4	4	4	4.5	4.5	4.5	4.125
11	English	Alveol Kırığı	5	4.5	4.75	5	5	5	5	5	5	4.9
11	Turkish	Alveol Kırığı	4.5	4.5	4.5	4.5	4.5	4.5	5	5	5	4.625
12	English	Sarsılma	5	4.5	4.75	4.5	4	4.25	5	5	5	4.6375
12	Turkish	Sarsılma	4	4	4	4	4.5	4.25	4.5	4.5	4.5	4.2125
13	English	Sublüksasyon	5	5	5	5	5	5	5	5	5	5
13	Turkish	Sublüksasyon	4.5	4.5	4.5	4.5	4.5	4.5	4	4.5	4.25	4.4375
14	English	Ekstrüsiv Lüksasyon	4.5	5	4.75	4.5	4.5	4.5	5	5	5	4.725
14	Turkish	Ekstrüsiv Lüksasyon	5	4.5	4.75	4	4	4	4.5	4.5	4.5	4.425
15	English	Lateral Lüksasyon	5	5	5	5	5	5	5	5	5	5
15	Turkish	Lateral Lüksasyon	4.5	4.5	4.5	4.5	4.5	4.5	5.5	4	4.75	4.5625
16	English	İntrusiv Lüksasyon	4.5	4	4.25	5	5	5	5	5	5	4.7
16	Turkish	İntrusiv Lüksasyon	4	4	4	4	4	4	4.5	4.5	4.5	4.125
17	English	İntrusiv Lüksasyon	5	5	5	5	5	5	5	5	5	5
17	Turkish	İntrusiv Lüksasyon	5	4.5	4.75	4.5	4	4.25	4.5	4.5	4.5	4.5125
18	English	Avülsiyon	5	4.5	4.75	4.5	5	4.75	5	5	5	4.8125
18	Turkish	Avülsiyon	5	4.5	4.75	4	4	4	4.5	4.5	4.5	4.425
19	English	Avülsiyon	5	5	5	5	5	5	5	5	5	5
19	Turkish	Avülsiyon	4.5	4.5	4.5	4.5	4.5	4.5	4	4.5	4.25	4.4375
20	English	Avülsiyon	4.5	5	4.75	4.5	4.5	4.5	5	5	5	4.725
20	Turkish	Avülsiyon	4	4	4	4	4	4	4.5	4.5	4.5	4.125
21	English	Avülsiyon	5	5	5	5	5	5	5	5	5	5
21	Turkish	Avülsiyon	4.5	4.5	4.5	4.5	4.5	4.5	4.5	5	4.75	4.5625
22	English	Avülsiyon	4.5	4.5	4.5	4.5	4.5	4.5	5	5	5	4.625
22	Turkish	Avülsiyon	4	4.5	4.25	4	4	4	4.5	4.5	4.5	4.225
23	English	Avülsiyon	5	5	5	5	5	5	5	5	5	5
23	Turkish	Avülsiyon	5	5	5	4.5	4.5	4.5	4.5	4	4.25	4.6375
24	English	Avülsiyon	4.5	4.5	4.5	4.5	4.5	4.5	5	5	5	4.625
24	Turkish	Avülsiyon	4.5	4	4.25	4	4	4	4.5	4.5	4.5	4.225
25	English	Avülsiyon	5	5	5	5	5	5	5	5	5	5
25	Turkish	Avülsiyon	4.5	4.5	4.5	4.5	4.5	4.5	5	5	5	4.625
26	English	Avülsiyon	5	4.5	4.75	4.5	4.5	4.5	5	5	5	4.725
26	Turkish	Avülsiyon	4	4	4	4	4	4	4.5	4.5	4.5	4.125
27	English	Avülsiyon	5	5	5	4.5	4.5	4.5	5	5	5	4.825
27	Turkish	Avülsiyon	4.5	4.5	4.5	4.5	4.5	4.5	5	5	5	4.625

## Sheet: Gemini
Gemini - Detailed Scores
Scenario	Language	Category	Acc_R1	Acc_R2	Acc_Con	Comp_R1	Comp_R2	Comp_Con	Safe_R1	Safe_R2	Safe_Con	Total
1	English	Komplike olmayan kron kırığı (Mine Kırığı)	5	4	4.5	4.5	4.5	4.5	5	5	5	4.625
1	Turkish	Komplike olmayan kron kırığı (Mine Kırığı)	5	4	4.5	4	4.5	4.25	5	5	5	4.5375
2	English	Komplike olmayan kron kırığı (Mine-Dentin Kırığı)	4	4.5	4.25	4	4	4	5	5	5	4.35
2	Turkish	Komplike olmayan kron kırığı (Mine-Dentin Kırığı)	4.5	4.5	4.5	4.5	4.5	4.5	5	5	5	4.625
3	English	Komplike kron kırığı	3.5	4.5	4	4	4	4	4	4	4	4
3	Turkish	Komplike kron kırığı	4	3.5	3.75	3.5	3.5	3.5	4	3.5	3.75	3.6625
4	English	Komplike kron kırığı	3.5	3.5	3.5	4.5	5	4.75	4	4	4	4.0625
4	Turkish	Komplike kron kırığı	3	2.5	2.75	3.5	3.5	3.5	4	4.5	4.25	3.3875
5	English	Komplike olmayan kron-kök kırığı	4	4.5	4.25	5	4.5	4.75	5	5	5	4.6125
5	Turkish	Komplike olmayan kron-kök kırığı	4	4	4	4	4	4	4.5	4.5	4.5	4.125
6	English	Komplike kron-kök kırığı	3	3	3	3.5	4	3.75	4.5	5	4.75	3.7
6	Turkish	Komplike kron-kök kırığı	5	4.5	4.75	4.5	5	4.75	5	5	5	4.8125
7	English	Kök kırığı	5	5	5	5	5	5	5	5	5	5
7	Turkish	Kök kırığı	4.5	4.5	4.5	4.5	4	4.25	5	5	5	4.5375
8	English	Kök kırığı	5	5	5	4.5	4.5	4.5	4	5	4.5	4.7
8	Turkish	Kök kırığı	3.5	3.5	3.5	3.5	4	3.75	4.5	4.5	4.5	3.8375
9	English	Kök kırığı	5	5	5	5	5	5	5	5	5	5
9	Turkish	Kök kırığı	4.5	4.5	4.5	4.5	4.5	4.5	5	5	5	4.625
10	English	Kök kırığı	4.5	4.5	4.5	5	5	5	5	5	5	4.8
10	Turkish	Kök kırığı	5	5	5	4.5	4.5	4.5	5	5	5	4.825
11	English	Alveol Kırığı	5	5	5	4.5	5	4.75	5	5	5	4.9125
11	Turkish	Alveol Kırığı	5	4.5	4.75	4.5	5	4.75	5	5	5	4.8125
12	English	Sarsılma	5	5	5	4.5	4.5	4.5	5	5	5	4.825
12	Turkish	Sarsılma	4.5	4.5	4.5	4.5	4.5	4.5	5	5	5	4.625
13	English	Sublüksasyon	5	5	5	5	5	5	5	5	5	5
13	Turkish	Sublüksasyon	4	4	4	4	4	4	4.5	5	4.75	4.1875
14	English	Ekstrüsiv Lüksasyon	5	5	5	5	5	5	5	5	5	5
14	Turkish	Ekstrüsiv Lüksasyon	5	4.5	4.75	4.5	4.5	4.5	5	5	5	4.725
15	English	Lateral Lüksasyon	5	4.5	4.75	5	5	5	5	5	5	4.9
15	Turkish	Lateral Lüksasyon	4.5	4.5	4.5	4.5	4.5	4.5	5	5	5	4.625
16	English	İntrusiv Lüksasyon	4.5	5	4.75	5	5	5	5	5	5	4.9
16	Turkish	İntrusiv Lüksasyon	4.5	5	4.75	4	4	4	5	4.5	4.75	4.4875
17	English	İntrusiv Lüksasyon	5	5	5	5	5	5	5	5	5	5
17	Turkish	İntrusiv Lüksasyon	4.5	4.5	4.5	5	4.5	4.75	5	5	5	4.7125
18	English	Avülsiyon	5	5	5	5	5	5	5	5	5	5
18	Turkish	Avülsiyon	4.5	4.5	4.5	4	4	4	4.5	4	4.25	4.2625
19	English	Avülsiyon	5	5	5	5	5	5	5	5	5	5
19	Turkish	Avülsiyon	4.5	4.5	4.5	4.5	4.5	4.5	4.5	4.5	4.5	4.5
20	English	Avülsiyon	4.5	5	4.75	5	5	5	5	5	5	4.9
20	Turkish	Avülsiyon	5	4.5	4.75	4.5	5	4.75	5	5	5	4.8125
21	English	Avülsiyon	5	5	5	4.5	5	4.75	5	5	5	4.9125
21	Turkish	Avülsiyon	4.5	5	4.75	5	4.5	4.75	5	5	5	4.8125
22	English	Avülsiyon	5	4.5	4.75	4.5	5	4.75	5	5	5	4.8125
22	Turkish	Avülsiyon	4	3.5	3.75	3.5	4	3.75	4	4.5	4.25	3.875
23	English	Avülsiyon	5	5	5	5	5	5	5	5	5	5
23	Turkish	Avülsiyon	4	4	4	3.5	4	3.75	4.5	4.5	4.5	4.0375
24	English	Avülsiyon	5	4.5	4.75	5	5	5	5	5	5	4.9
24	Turkish	Avülsiyon	5	5	5	4.5	4.5	4.5	5	5	5	4.825
25	English	Avülsiyon	5	5	5	5	5	5	5	5	5	5
25	Turkish	Avülsiyon	5	4.5	4.75	4.5	4.5	4.5	5	5	5	4.725
26	English	Avülsiyon	4	4	4	4.5	4.5	4.5	4	4	4	4.175
26	Turkish	Avülsiyon	5	5	5	5	5	5	5	5	5	5
27	English	Avülsiyon	5	5	5	5	5	5	5	5	5	5
27	Turkish	Avülsiyon	5	5	5	5	5	5	5	5	5	5

## Sheet: Claude
Claude - Detailed Scores
Scenario	Language	Category	Acc_R1	Acc_R2	Acc_Con	Comp_R1	Comp_R2	Comp_Con	Safe_R1	Safe_R2	Safe_Con	Total
1	English	Komplike olmayan kron kırığı (Mine Kırığı)	4	4	4	3.5	4	3.75	5	5	5	4.1625
1	Turkish	Komplike olmayan kron kırığı (Mine Kırığı)	3.5	3	3.25	3.5	3.5	3.5	4.5	4.5	4.5	3.65
2	English	Komplike olmayan kron kırığı (Mine-Dentin Kırığı)	4.5	5	4.75	4	4.5	4.25	5	5	5	4.6375
2	Turkish	Komplike olmayan kron kırığı (Mine-Dentin Kırığı)	4.5	4.5	4.5	4.5	4.5	4.5	5	5	5	4.625
3	English	Komplike kron kırığı	2.5	2.5	2.5	3	2.5	2.75	3.5	3.5	3.5	2.8375
3	Turkish	Komplike kron kırığı	5	5	5	4.5	4	4.25	5	5	5	4.7375
4	English	Komplike kron kırığı	3.5	3.5	3.5	4	4	4	3.5	4	3.75	3.7375
4	Turkish	Komplike kron kırığı	4.5	5	4.75	4.5	4.5	4.5	5	5	5	4.725
5	English	Komplike olmayan kron-kök kırığı	4	4	4	4	4	4	4	5	4.5	4.125
5	Turkish	Komplike olmayan kron-kök kırığı	4	3.5	3.75	4	4	4	4.5	4.5	4.5	4.025
6	English	Komplike kron-kök kırığı	3.5	3.5	3.5	3.5	3.5	3.5	5	4.5	4.75	3.8125
6	Turkish	Komplike kron-kök kırığı	4	4	4	3.5	3.5	3.5	5	4.5	4.75	4.0125
7	English	Kök kırığı	4.5	5	4.75	4.5	4.5	4.5	5	5	5	4.725
7	Turkish	Kök kırığı	4.5	4.5	4.5	4.5	4	4.25	5	5	5	4.5375
8	English	Kök kırığı	4	4	4	4	3	3.5	4.5	4.5	4.5	3.95
8	Turkish	Kök kırığı	4	4	4	3.5	3	3.25	4.5	4.5	4.5	3.8625
9	English	Kök kırığı	4	4	4	4.5	4.5	4.5	5	5	5	4.425
9	Turkish	Kök kırığı	4.5	5	4.75	4.5	4	4.25	5	5	5	4.6375
10	English	Kök kırığı	5	4.5	4.75	4.5	4.5	4.5	5	5	5	4.725
10	Turkish	Kök kırığı	4.5	4.5	4.5	4.5	4.5	4.5	5	5	5	4.625
11	English	Alveol Kırığı	5	5	5	4.5	4.5	4.5	5	5	5	4.825
11	Turkish	Alveol Kırığı	5	4	4.5	5	4.5	4.75	5	5	5	4.7125
12	English	Sarsılma	4.5	4.5	4.5	4.5	4.5	4.5	5	5	5	4.625
12	Turkish	Sarsılma	4.5	4.5	4.5	4.5	4.5	4.5	5	4.5	4.75	4.5625
13	English	Sublüksasyon	3.5	4	3.75	4	4	4	5	5	5	4.15
13	Turkish	Sublüksasyon	3.5	3.5	3.5	4	4	4	5	5	5	4.05
14	English	Ekstrüsiv Lüksasyon	4.5	4.5	4.5	4.5	4.5	4.5	5	5	5	4.625
14	Turkish	Ekstrüsiv Lüksasyon	4.5	4	4.25	4.5	4.5	4.5	5	5	5	4.525
15	English	Lateral Lüksasyon	4.5	4.5	4.5	4.5	5	4.75	5	5	5	4.7125
15	Turkish	Lateral Lüksasyon	4.5	4.5	4.5	4.5	5	4.75	5	4.5	4.75	4.65
16	English	İntrusiv Lüksasyon	4.5	3.5	4	4.5	4.5	4.5	4.5	5	4.75	4.3625
16	Turkish	İntrusiv Lüksasyon	3	3	3	3.5	3.5	3.5	3.5	3.5	3.5	3.3
17	English	İntrusiv Lüksasyon	4	4.5	4.25	4.5	4	4.25	5	5	5	4.4375
17	Turkish	İntrusiv Lüksasyon	4.5	5	4.75	4.5	4.5	4.5	5	5	5	4.725
18	English	Avülsiyon	4.5	5	4.75	4	4	4	4.5	5	4.75	4.4875
18	Turkish	Avülsiyon	4	4	4	4.5	4	4.25	4	4	4	4.0875
19	English	Avülsiyon	5	4.5	4.75	4.5	4.5	4.5	5	5	5	4.725
19	Turkish	Avülsiyon	5	4.5	4.75	3.5	4	3.75	5	5	5	4.4625
20	English	Avülsiyon	4.5	4.5	4.5	5	5	5	5	5	5	4.8
20	Turkish	Avülsiyon	5	4.5	4.75	4.5	4.5	4.5	5	5	5	4.725
21	English	Avülsiyon	4.5	4.5	4.5	4	4.5	4.25	5	5	5	4.5375
21	Turkish	Avülsiyon	4.5	4.5	4.5	5	4.5	4.75	5	5	5	4.7125
22	English	Avülsiyon	4	4	4	4	4	4	4.5	4.5	4.5	4.125
22	Turkish	Avülsiyon	4	4	4	4	4	4	4.5	5	4.75	4.1875
23	English	Avülsiyon	4	4	4	4	4.5	4.25	4.5	4.5	4.5	4.2125
23	Turkish	Avülsiyon	4	3.5	3.75	4	4	4	4.5	5	4.75	4.0875
24	English	Avülsiyon	5	5	5	4.5	4.5	4.5	5	5	5	4.825
24	Turkish	Avülsiyon	4.5	4.5	4.5	4.5	4.5	4.5	5	5	5	4.625
25	English	Avülsiyon	4	5	4.5	4	4.5	4.25	5	5	5	4.5375
25	Turkish	Avülsiyon	4.5	4	4.25	4	4	4	4.5	5	4.75	4.2875
26	English	Avülsiyon	5	5	5	5	5	5	5	5	5	5
26	Turkish	Avülsiyon	5	5	5	5	4.5	4.75	5	5	5	4.9125
27	English	Avülsiyon	5	4.5	4.75	5	5	5	5	5	5	4.9
27	Turkish	Avülsiyon	5	5	5	5	5	5	5	5	5	5
