# Supplementary material for: Impact of Query Language on Large Language Model Performance in Dental Trauma Management: A Comparative Evaluation of ChatGPT, Gemini, and Claude
Source: Research Square preprint supplement (doi:10.21203/rs.3.rs-8754479/v1), 2026-02-20
Supplement: Supplementary file 2 [file b6cee0511863ce2323c8b7bc.docx]

**SUPPLEMENTARY MATERIALS**

Impact of Query Language on Large Language Model Performance

in Dental Trauma Management

**Contents:**

Supplementary File 1: Clinical Scenarios

Supplementary File 2: Evaluation Rubric

Supplementary File 3: Raw Scoring Data

Supplementary File 4: Statistical Analysis Details

**Supplementary File 1: Clinical Scenarios**

Twenty-seven clinical scenarios were developed based on the IADT 2020 Guidelines, covering 13 trauma categories. Each scenario describes a hypothetical patient presentation without explicitly naming the diagnosis, requiring the AI models to identify the injury type from clinical presentations.

**Table S1.** Scenario Distribution by Trauma Category

| **Trauma Category** | **Number of Scenarios** |
| --- | --- |
| Uncomplicated Crown Fracture (Enamel Fracture) | 1 |
| Uncomplicated Crown Fracture (Enamel-Dentin Fracture) | 1 |
| Complicated Crown Fracture | 2 |
| Uncomplicated Crown-Root Fracture | 1 |
| Complicated Crown-Root Fracture | 1 |
| Root Fracture | 4 |
| Alveolar Fracture | 1 |
| Concussion | 1 |
| Subluxation | 1 |
| Extrusive Luxation | 1 |
| Lateral Luxation | 1 |
| Intrusive Luxation | 2 |
| Avulsion | 10 |
| **Total** | **27** |

**Clinical Scenarios (Turkish and English)**

**Scenario 1:** *Uncomplicated Crown Fracture (Enamel Fracture)*

**Turkish Version:**

12 yaşında bir erkek çocuk bisiklet kazası sonrası kliniğimize başvurdu. Travmadan 2 saat sonra muayene edildi. Üst sol merkezi kesici dişte (21 no'lu diş) mine tabakasında sınırlı, dentin ekspozisyonu olmayan bir kırık tespit edildi. Diş mobil değil, perküsyona hafif hassas ve pulpa testlerine pozitif yanıt veriyor. Radyografide kök veya alveoler kemik patolojisi görülmüyor. Bu hastaya yaklaşımınız ne olurdu?

**English Version:**

A 12-year-old boy presented to our clinic following a bicycle accident. He was examined 2 hours after the trauma. A fracture limited to the enamel layer without dentin exposure was detected in the upper left central incisor (tooth #21). The tooth is not mobile, slightly sensitive to percussion, and responds positively to pulp tests. No root or alveolar bone pathology is seen on radiograph. What would be your approach to this patient?

**Scenario 2:** *Uncomplicated Crown Fracture (Enamel-Dentin Fracture)*

**Turkish Version:**

9 yaşında bir kız çocuk, oyun parkında düşme sonrası üst kesici dişinde kırık şikayetiyle başvurdu. Travmadan 4 saat sonra değerlendirildi. 11 no'lu dişte mine ve dentin tabakalarını içeren ancak pulpa ekspozisyonu olmayan bir kırık görüldü. Diş mobil değil, perküsyon testi negatif, termal testlere pozitif yanıt alınıyor. Kırık kenarları keskin ve hasta oklüzyonda rahatsızlık hissediyor. Radyografik muayenede açık apeksli kök gelişimi devam eden bir diş görülmektedir. Bu durumda tedavi yaklaşımınız nedir?

**English Version:**

A 9-year-old girl presented with a complaint of a fractured upper incisor after falling at a playground. She was evaluated 4 hours after the trauma. A fracture involving the enamel and dentin layers but without pulp exposure was observed in tooth #11. The tooth is not mobile, percussion test is negative, and there is a positive response to thermal tests. The fracture edges are sharp, and the patient feels discomfort in occlusion. Radiographic examination reveals a tooth with open apex and ongoing root development. What is your treatment approach in this situation?

**Scenario 3:** *Complicated Crown Fracture*

**Turkish Version:**

15 yaşında bir erkek hasta, basketbol oynarken dirsek darbesi sonrası üst ön dişinde kırık ve ağrı şikayetiyle acil servise başvurdu. Muayenede 21 no'lu dişte mine ve dentini içeren, pulpanın ekspozisyonu görülen bir kırık tespit edildi. Ekspozisyon alanı yaklaşık 1.5 mm çapında ve kanama mevcut. Diş mobil değil ve radyografide kök gelişimi tamamlanmış görünüyor. Travmadan bu yana 3 saat geçmiş durumda. Tedavi planınız nedir?

**English Version:**

A 15-year-old male patient presented to the emergency department with a complaint of a fractured upper front tooth and pain after being hit by an elbow while playing basketball. Examination revealed a fracture involving enamel and dentin with pulp exposure in tooth #21. The exposure area is approximately 1.5 mm in diameter with bleeding present. The tooth is not mobile, and radiograph shows completed root development. 3 hours have passed since the trauma. What is your treatment plan?

**Scenario 4:** *Complicated Crown Fracture*

**Turkish Version:**

8 yaşında bir kız çocuk, merdivenden düşme sonrası ön dişlerinde şiddetli ağrı şikayetiyle başvurdu. Travmadan 45 dakika sonra değerlendirildi. 11 no'lu dişte mine-dentin kırığı ve açıkça görülebilen pulpa ekspozisyonu tespit edildi. Ekspozisyon bölgesi yaklaşık 2 mm çapında ve aktif kanama var. Radyografide açık apeks ve devam eden kök gelişimi görülmektedir. Diş mobil değil ve oklüzyonda herhangi bir sorun yok. Tedavi yaklaşımınız ne olur?

**English Version:**

An 8-year-old girl presented with severe pain in her front teeth after falling down stairs. She was evaluated 45 minutes after the trauma. An enamel-dentin fracture with clearly visible pulp exposure was detected in tooth #11. The exposure area is approximately 2 mm in diameter with active bleeding. Radiograph shows an open apex and ongoing root development. The tooth is not mobile, and there are no issues with occlusion. What would be your treatment approach?

**Scenario 5:** *Uncomplicated Crown-Root Fracture*

**Turkish Version:**

35 yaşında bir erkek hasta, trafik kazası sonrası üst ön dişinde kırık şikayetiyle başvurdu. Muayenede 21 no'lu dişte kron ve kökü içeren, diş eti seviyesinin altına uzanan bir kırık hattı tespit edildi. Pulpa ekspozisyonu yok ancak kırık fragman hareketli. Diş perküsyona hassas ve minimal mobilite gösteriyor. Radyografide kırık hattı açıkça görülüyor ve kök gelişimi tamamlanmış. Bu durumda tedavi planınız ne olurdu?

**English Version:**

A 35-year-old male patient presented with a complaint of a fractured upper front tooth following a traffic accident. Examination revealed a fracture line involving the crown and root, extending below the gingival level in tooth #21. There is no pulp exposure, but the fractured fragment is mobile. The tooth is sensitive to percussion and shows minimal mobility. The fracture line is clearly visible on radiograph, and root development is complete. What would be your treatment plan in this situation?

**Scenario 6:** *Complicated Crown-Root Fracture*

**Turkish Version:**

28 yaşında bir kadın hasta, spor yaralanması sonrası üst kesici dişinde kırık ve şiddetli ağrı şikayetiyle başvurdu. Muayenede 11 no'lu dişte kron ve kökü içeren oblik bir kırık tespit edildi. Kırık hattı diş eti seviyesinin 2 mm altına uzanıyor ve pulpa ekspozisyonu mevcut. Koronal fragman mobil ve hasta ısırma sırasında şiddetli ağrı hissediyor. Radyografide kök gelişimi tamamlanmış görülüyor. Bu hastaya yaklaşımınız ne olurdu?

**English Version:**

A 28-year-old female patient presented with a complaint of a fractured upper incisor and severe pain following a sports injury. Examination revealed an oblique fracture involving the crown and root in tooth #11. The fracture line extends 2 mm below the gingival level, and pulp exposure is present. The coronal fragment is mobile, and the patient experiences severe pain when biting. Radiograph shows completed root development. What would be your approach to this patient?

**Scenario 7:** *Root Fracture*

**Turkish Version:**

10 yaşında bir erkek çocuk, futbol oynarken top çarpması sonrası üst ön dişinde ağrı ve hafif mobilite şikayetiyle başvurdu. Travmadan 2 saat sonra muayene edildi. 21 no'lu dişte kron kırığı yok ancak diş grade 2 mobilite gösteriyor ve perküsyona hassas. Radyografide kök orta 1/3 bölgesinde horizontal bir kırık hattı tespit edildi. Kök gelişimi devam etmekte ve apeks açık. Bu hastada tedavi yaklaşımınız nedir?

**English Version:**

A 10-year-old boy presented with pain and slight mobility in his upper front tooth after being hit by a ball while playing football. He was examined 2 hours after the trauma. Tooth #21 shows no crown fracture, but the tooth demonstrates grade 2 mobility and is sensitive to percussion. Radiograph revealed a horizontal fracture line in the middle 1/3 of the root. Root development is ongoing, and the apex is open. What is your treatment approach in this patient?

**Scenario 8:** *Root Fracture*

**Turkish Version:**

16 yaşında bir kız çocuk, bisiklet kazası sonrası üst kesici dişinde mobilite ve ağrı şikayetiyle başvurdu. Muayenede 11 no'lu dişte grade 2-3 mobilite tespit edildi ve diş hafifçe ekstrüze görünüyor. Perküsyon testi pozitif. Radyografide kök apikal 1/3 bölgesinde oblik bir kırık hattı görülmektedir. Kök gelişimi tamamlanmış ve koronal fragman deplase. Travmadan bu yana 4 saat geçmiş. Bu durumda ne yaparsınız?

**English Version:**

A 16-year-old girl presented with mobility and pain in her upper incisor following a bicycle accident. Examination revealed grade 2-3 mobility in tooth #11, and the tooth appears slightly extruded. Percussion test is positive. Radiograph shows an oblique fracture line in the apical 1/3 of the root. Root development is complete, and the coronal fragment is displaced. 4 hours have passed since the trauma. What would you do in this situation?

**Scenario 9:** *Root Fracture*

**Turkish Version:**

25 yaşında bir erkek hasta, kavga sırasında yumruk darbesi sonrası üst ön dişinde şiddetli mobilite şikayetiyle başvurdu. Travmadan 6 saat sonra değerlendirildi. 21 no'lu dişte grade 3 mobilite mevcut ve diş belirgin şekilde ekstrüze olmuş. Radyografide servikal 1/3 bölgesinde horizontal bir kök kırığı tespit edildi. Kök gelişimi tamamlanmış. Hasta ağrıdan dolayı dişlerini birbirine değdiremiyor. Tedavi planınız ne olur?

**English Version:**

A 25-year-old male patient presented with severe mobility in his upper front tooth after being punched during a fight. He was evaluated 6 hours after the trauma. Tooth #21 shows grade 3 mobility, and the tooth is significantly extruded. Radiograph revealed a horizontal root fracture in the cervical 1/3. Root development is complete. The patient cannot bring his teeth together due to pain. What would be your treatment plan?

**Scenario 10:** *Root Fracture*

**Turkish Version:**

13 yaşında bir erkek çocuk, kaykay kazası sonrası üst ön dişinde mobilite şikayetiyle başvurdu. Muayenede 11 no'lu dişte grade 1-2 mobilite tespit edildi. Diş pozisyonunda değişiklik yok ve kron intakt. Perküsyon testine hafif hassasiyet var. Radyografide kök apikal 1/3 bölgesinde ince bir kırık hattı görülüyor. Kök gelişimi devam etmekte. Travmadan 3 saat sonra başvurdu. Bu hastada yaklaşımınız ne olur?

**English Version:**

A 13-year-old boy presented with mobility in his upper front tooth following a skateboarding accident. Examination revealed grade 1-2 mobility in tooth #11. There is no change in tooth position, and the crown is intact. There is slight sensitivity to percussion test. Radiograph shows a thin fracture line in the apical 1/3 of the root. Root development is ongoing. He presented 3 hours after the trauma. What would be your approach in this patient?

**Scenario 11:** *Alveolar Fracture*

**Turkish Version:**

7 yaşında bir erkek çocuk, salıncaktan düşme sonrası üst ön bölgede ağrı, şişlik ve kanama şikayetiyle başvurdu. Travmadan 1 saat sonra değerlendirildi. Muayenede 11 ve 21 no'lu dişleri içeren alveoler segment deplase ve mobil görünüyor. Her iki dişte de mobilite mevcut ve oklüzyon bozulmuş. Diş etlerinde laserasyon ve kanama var. Radyografide alveoler kemik kırığı tespit edildi ve her iki dişin kök gelişimi devam etmekte. Bu hastada tedavi yaklaşımınız ne olur?

**English Version:**

A 7-year-old boy presented with pain, swelling, and bleeding in the upper anterior region after falling from a swing. He was evaluated 1 hour after the trauma. Examination shows the alveolar segment involving teeth #11 and #21 appears displaced and mobile. Both teeth demonstrate mobility, and occlusion is disturbed. There is laceration and bleeding in the gingiva. Radiograph revealed an alveolar bone fracture, and root development is ongoing in both teeth. What would be your treatment approach in this patient?

**Scenario 12:** *Concussion*

**Turkish Version:**

11 yaşında bir kız çocuk, voleybol oynarken topa çarpma sonrası üst ön dişinde hassasiyet şikayetiyle başvurdu. Travmadan 24 saat sonra değerlendirildi. 21 no'lu dişte mobilite yok, diş pozisyonunda değişiklik yok ve kron intakt. Perküsyona hafif hassasiyet mevcut ancak pulpa testlerine yanıt normal. Radyografide herhangi bir patoloji görülmüyor ve kök gelişimi tamamlanmış. Bu hastaya yaklaşımınız ne olurdu?

**English Version:**

An 11-year-old girl presented with sensitivity in her upper front tooth after being hit by a ball while playing volleyball. She was evaluated 24 hours after the trauma. Tooth #21 shows no mobility, no change in tooth position, and the crown is intact. There is slight sensitivity to percussion, but response to pulp tests is normal. No pathology is seen on radiograph, and root development is complete. What would be your approach to this patient?

**Scenario 13:** *Subluxation*

**Turkish Version:**

14 yaşında bir erkek çocuk, basketbol oynarken dirsek darbesi sonrası üst ön dişinde ağrı ve kanama şikayetiyle başvurdu. Travmadan 3 saat sonra muayene edildi. 11 no'lu dişte hafif mobilite (grade 1) tespit edildi, diş pozisyonunda değişiklik yok ve kron intakt. Perküsyona hassas ve sulkustan kanama mevcut. Pulpa testlerine yanıt pozitif. Radyografide patoloji görülmüyor ve kök gelişimi tamamlanmış. Bu durumda tedavi planınız nedir?

**English Version:**

A 14-year-old boy presented with pain and bleeding in his upper front tooth after being hit by an elbow while playing basketball. He was examined 3 hours after the trauma. Tooth #11 shows slight mobility (grade 1), no change in tooth position, and the crown is intact. The tooth is sensitive to percussion, and there is bleeding from the sulcus. Response to pulp tests is positive. No pathology is seen on radiograph, and root development is complete. What is your treatment plan in this situation?

**Scenario 14:** *Extrusive Luxation*

**Turkish Version:**

9 yaşında bir kız çocuk, bisiklet kazası sonrası üst ön dişinin uzamış göründüğü şikayetiyle başvurdu. Travmadan 2 saat sonra değerlendirildi. 21 no'lu diş yaklaşık 4 mm ekstrüze olmuş ve grade 2-3 mobilite gösteriyor. Perküsyona hassas ve pulpa testlerine yanıt belirsiz. Radyografide periodontal ligament aralığında genişleme görülüyor ve kök gelişimi devam etmekte (açık apeks). Tedavi yaklaşımınız ne olur?

**English Version:**

A 9-year-old girl presented with a complaint that her upper front tooth appeared elongated after a bicycle accident. She was evaluated 2 hours after the trauma. Tooth #21 is extruded approximately 4 mm and shows grade 2-3 mobility. The tooth is sensitive to percussion, and response to pulp tests is uncertain. Radiograph shows widening of the periodontal ligament space, and root development is ongoing (open apex). What would be your treatment approach?

**Scenario 15:** *Lateral Luxation*

**Turkish Version:**

17 yaşında bir erkek hasta, motosiklet kazası sonrası üst ön dişinde yer değiştirme ve ağrı şikayetiyle başvurdu. Travmadan 4 saat sonra muayene edildi. 11 no'lu diş palatinal yönde yer değiştirmiş ve grade 2 mobilite gösteriyor. Oklüzyon bozulmuş ve hasta dişlerini birbirine değdiremiyor. Perküsyona şiddetli hassasiyet var. Radyografide periodontal ligament aralığında düzensizlik ve apikal bölgede hafif genişleme görülüyor. Kök gelişimi tamamlanmış. Bu hastada ne yaparsınız?

**English Version:**

A 17-year-old male patient presented with displacement and pain in his upper front tooth following a motorcycle accident. He was examined 4 hours after the trauma. Tooth #11 is displaced palatally and shows grade 2 mobility. Occlusion is disturbed, and the patient cannot bring his teeth together. There is severe sensitivity to percussion. Radiograph shows irregularity in the periodontal ligament space and slight widening in the apical region. Root development is complete. What would you do in this patient?

**Scenario 16:** *Intrusive Luxation*

**Turkish Version:**

8 yaşında bir erkek çocuk, oyun parkında düşme sonrası üst ön dişinin diş eti içine gömüldüğü şikayetiyle başvurdu. Travmadan 1 saat sonra değerlendirildi. 21 no'lu diş yaklaşık 3 mm intrüze olmuş. Diş perküsyona metalik ses veriyor ve mobil değil. Radyografide kök gelişimi devam etmekte (açık apeks) ve periodontal ligament aralığı apikal bölgede görülmüyor. Tedavi planınız ne olur?

**English Version:**

An 8-year-old boy presented with a complaint that his upper front tooth had been pushed into the gum after falling at a playground. He was evaluated 1 hour after the trauma. Tooth #21 is intruded approximately 3 mm. The tooth gives a metallic sound on percussion and is not mobile. Radiograph shows ongoing root development (open apex), and the periodontal ligament space is not visible in the apical region. What would be your treatment plan?

**Scenario 17:** *Intrusive Luxation*

**Turkish Version:**

22 yaşında bir kadın hasta, trafik kazası sonrası üst ön dişinin diş eti içine gömüldüğü şikayetiyle acil servise başvurdu. Travmadan 3 saat sonra değerlendirildi. 11 no'lu diş 5 mm'den fazla intrüze olmuş. Perküsyonda yüksek metalik ses alınıyor ve diş mobil değil. Radyografide kök gelişimi tamamlanmış ve periodontal ligament aralığı görülmüyor. Bu hastada tedavi yaklaşımınız ne olur?

**English Version:**

A 22-year-old female patient presented to the emergency department with a complaint that her upper front tooth had been pushed into the gum following a traffic accident. She was evaluated 3 hours after the trauma. Tooth #11 is intruded more than 5 mm. A high metallic sound is heard on percussion, and the tooth is not mobile. Radiograph shows complete root development, and the periodontal ligament space is not visible. What would be your treatment approach in this patient?

**Scenario 18:** *Avulsion*

**Turkish Version:**

7 yaşında bir erkek çocuk, okul bahçesinde düşme sonrası dişinin tamamen yerinden çıktığı şikayetiyle annesi tarafından acil servise getirildi. Diş kuru bir mendil içinde saklanmış ve travmadan bu yana 20 dakika geçmiş. Muayenede 21 no'lu dişin soket boş ve minimal kanama mevcut. Dişin kökü incelendiğinde kök gelişiminin devam ettiği (açık apeks) görülüyor. Diş yüzeyi temiz görünüyor. Bu hastada ne yaparsınız?

**English Version:**

A 7-year-old boy was brought to the emergency department by his mother with a complaint that his tooth had completely come out after falling in the school yard. The tooth has been stored in a dry tissue, and 20 minutes have passed since the trauma. Examination shows the socket of tooth #21 is empty with minimal bleeding. When the root of the tooth is examined, ongoing root development (open apex) is observed. The tooth surface appears clean. What would you do in this patient?

**Scenario 19:** *Avulsion*

**Turkish Version:**

12 yaşında bir kız çocuk, bisiklet kazası sonrası dişinin düştüğü şikayetiyle başvurdu. Diş soğuk süt içinde saklanmış ve travmadan bu yana 45 dakika geçmiş. Muayenede 11 no'lu dişin soketi boş, hafif kanama ve çevre yumuşak dokuda abrazyon mevcut. Dişin kök gelişimi tamamlanmış (kapalı apeks). Diş yüzeyi temiz ve kontaminasyon yok. Tedavi yaklaşımınız ne olur?

**English Version:**

A 12-year-old girl presented with a complaint that her tooth had fallen out after a bicycle accident. The tooth has been stored in cold milk, and 45 minutes have passed since the trauma. Examination shows the socket of tooth #11 is empty with slight bleeding and abrasion in the surrounding soft tissue. Root development of the tooth is complete (closed apex). The tooth surface is clean without contamination. What would be your treatment approach?

**Scenario 20:** *Avulsion*

**Turkish Version:**

9 yaşında bir erkek çocuk, futbol oynarken çarpışma sonrası dişinin yerinden çıktığı şikayetiyle başvurdu. Diş ağız içinde yanağın altında tutulmuş ve travmadan bu yana 15 dakika geçmiş. Muayenede 21 no'lu dişin soketi boş ve aktif kanama mevcut. Dişin kök gelişimi devam etmekte (açık apeks). Diş yüzeyi tükürükle ıslanmış durumda. Bu hastada tedavi planınız nedir?

**English Version:**

A 9-year-old boy presented with a complaint that his tooth had come out after a collision while playing football. The tooth has been kept in the mouth under the cheek, and 15 minutes have passed since the trauma. Examination shows the socket of tooth #21 is empty with active bleeding. Root development of the tooth is ongoing (open apex). The tooth surface is wet with saliva. What is your treatment plan in this patient?

**Scenario 21:** *Avulsion*

**Turkish Version:**

16 yaşında bir erkek hasta, kavga sırasında dişinin düştüğü şikayetiyle acil servise başvurdu. Diş kuru ortamda saklanmış ve travmadan bu yana 2 saat geçmiş. Muayenede 11 no'lu dişin soketi boş, minimal kanama var ve çevre diş eti dokusunda laserasyon mevcut. Dişin kök gelişimi tamamlanmış (kapalı apeks). Diş yüzeyi kuru ve kirli görünüyor. Bu durumda ne yaparsınız?

**English Version:**

A 16-year-old male patient presented to the emergency department with a complaint that his tooth had fallen out during a fight. The tooth has been stored in a dry environment, and 2 hours have passed since the trauma. Examination shows the socket of tooth #11 is empty with minimal bleeding and laceration in the surrounding gingival tissue. Root development of the tooth is complete (closed apex). The tooth surface appears dry and dirty. What would you do in this situation?

**Scenario 22:** *Avulsion*

**Turkish Version:**

10 yaşında bir kız çocuk, havuz kenarında düşme sonrası dişinin yerinden çıktığı şikayetiyle başvurdu. Diş havuz suyunda bekletilmiş ve travmadan bu yana 30 dakika geçmiş. Muayenede 21 no'lu dişin soketi boş ve hafif kanama mevcut. Dişin kök gelişimi devam etmekte (açık apeks). Diş yüzeyi klor içeren havuz suyuyla kontamine olmuş. Tedavi yaklaşımınız ne olur?

**English Version:**

A 10-year-old girl presented with a complaint that her tooth had come out after falling by the poolside. The tooth has been kept in pool water, and 30 minutes have passed since the trauma. Examination shows the socket of tooth #21 is empty with slight bleeding. Root development of the tooth is ongoing (open apex). The tooth surface has been contaminated with chlorinated pool water. What would be your treatment approach?

**Scenario 23:** *Avulsion*

**Turkish Version:**

14 yaşında bir erkek çocuk, kaykay kazası sonrası dişinin düştüğü şikayetiyle başvurdu. Diş plastik bir poşet içinde saklanmış ve travmadan bu yana 1 saat 15 dakika geçmiş. Muayenede 11 no'lu dişin soketi boş ve pıhtı oluşumu başlamış. Dişin kök gelişimi tamamlanmış (kapalı apeks). Diş yüzeyi kuru görünüyor ancak belirgin kontaminasyon yok. Bu hastada ne yaparsınız?

**English Version:**

A 14-year-old boy presented with a complaint that his tooth had fallen out after a skateboarding accident. The tooth has been stored in a plastic bag, and 1 hour and 15 minutes have passed since the trauma. Examination shows the socket of tooth #11 is empty and clot formation has begun. Root development of the tooth is complete (closed apex). The tooth surface appears dry but without significant contamination. What would you do in this patient?

**Scenario 24:** *Avulsion*

**Turkish Version:**

8 yaşında bir kız çocuk, salıncaktan düşme sonrası ön dişinin yerinden çıktığı şikayetiyle annesi tarafından getirildi. Anne dişi hemen süte koymuş ve travmadan bu yana 25 dakika geçmiş. Muayenede 21 no'lu dişin soketi boş, hafif kanama mevcut ve çevre yumuşak dokuda ödem var. Dişin kök gelişimi devam etmekte (açık apeks). Diş yüzeyi temiz ve nemli. Tedavi planınız ne olur?

**English Version:**

An 8-year-old girl was brought by her mother with a complaint that her front tooth had come out after falling from a swing. The mother immediately put the tooth in milk, and 25 minutes have passed since the trauma. Examination shows the socket of tooth #21 is empty with slight bleeding and edema in the surrounding soft tissue. Root development of the tooth is ongoing (open apex). The tooth surface is clean and moist. What would be your treatment plan?

**Scenario 25:** *Avulsion*

**Turkish Version:**

18 yaşında bir erkek hasta, basketbol oynarken dirsek darbesi sonrası dişinin düştüğü şikayetiyle başvurdu. Diş buzdolabından alınan soğuk suda saklanmış ve travmadan bu yana 50 dakika geçmiş. Muayenede 11 no'lu dişin soketi boş ve minimal kanama mevcut. Dişin kök gelişimi tamamlanmış (kapalı apeks). Diş yüzeyi nemli ve temiz görünüyor. Bu durumda tedavi yaklaşımınız ne olur?

**English Version:**

An 18-year-old male patient presented with a complaint that his tooth had fallen out after being hit by an elbow while playing basketball. The tooth has been stored in cold water from the refrigerator, and 50 minutes have passed since the trauma. Examination shows the socket of tooth #11 is empty with minimal bleeding. Root development of the tooth is complete (closed apex). The tooth surface appears moist and clean. What would be your treatment approach in this situation?

**Scenario 26:** *Avulsion*

**Turkish Version:**

11 yaşında bir erkek çocuk, bisiklet kazası sonrası iki ön dişinin birden yerinden çıktığı şikayetiyle acil servise getirildi. Dişler kuru bir kağıt havlu içinde saklanmış ve travmadan bu yana 1.5 saat geçmiş. Muayenede 11 ve 21 no'lu dişlerin soketleri boş, orta düzeyde kanama mevcut ve çevre yumuşak dokuda laserasyon var. Her iki dişin kök gelişimi devam etmekte (açık apeks). Diş yüzeyleri kuru ve hafif kirli görünüyor. Bu hastada tedavi planınız nedir?

**English Version:**

An 11-year-old boy was brought to the emergency department with a complaint that both of his front teeth had come out after a bicycle accident. The teeth have been stored in a dry paper towel, and 1.5 hours have passed since the trauma. Examination shows the sockets of teeth #11 and #21 are empty with moderate bleeding and laceration in the surrounding soft tissue. Root development is ongoing in both teeth (open apex). The tooth surfaces appear dry and slightly dirty. What is your treatment plan in this patient?

**Scenario 27:** *Avulsion*

**Turkish Version:**

19 yaşında bir kadın hasta, trafik kazası sonrası dişinin düştüğü şikayetiyle acil servise başvurdu. Diş yere düşmüş ve toprak ile kontamine olmuş, daha sonra musluk suyuyla yıkanarak kuru bir mendil içinde saklanmış. Travmadan bu yana 3 saat geçmiş. Muayenede 21 no'lu dişin soketi boş ve organize pıhtı oluşumu mevcut. Dişin kök gelişimi tamamlanmış (kapalı apeks). Diş yüzeyi kuru görünüyor. Çevre yumuşak dokuda abrazyon ve laserasyon mevcut. Bu durumda ne yaparsınız?

**English Version:**

A 19-year-old female patient presented to the emergency department with a complaint that her tooth had fallen out following a traffic accident. The tooth fell on the ground and was contaminated with soil, then was rinsed with tap water and stored in a dry tissue. 3 hours have passed since the trauma. Examination shows the socket of tooth #21 is empty with organized clot formation. Root development of the tooth is complete (closed apex). The tooth surface appears dry. There is abrasion and laceration in the surrounding soft tissue. What would you do in this situation?

**Supplementary File 2: Evaluation Rubric**

A comprehensive evaluation rubric was developed based on the IADT 2020 Guidelines. Model responses were evaluated across three dimensions with the following weighting: Accuracy (40%), Completeness (35%), and Safety (25%).

**Table S2.** Scoring Scale (0-5 Points per Dimension)

| **Score** | **Level** | **Criteria** |
| --- | --- | --- |
| 5 | Excellent | Complete concordance with IADT 2020; all components present; no safety concerns |
| 4 | Good | Minor deviations in details; most components present; safety considerations adequate |
| 3 | Acceptable | Correct approach with significant parameter errors; some components missing; minor safety gaps |
| 2 | Inadequate | Multiple critical errors; several components missing; potential safety concerns |
| 1 | Poor | Largely incorrect; minimal components addressed; safety issues present |
| 0 | Unacceptable | Completely wrong or contradicts guidelines; endangers patient safety |

**Accuracy Evaluation Criteria (Weight: 40%)**

• Correctness of diagnosis/injury identification

• Appropriateness of treatment approach

• Splint type and duration recommendations

• Antibiotic selection and dosing (when indicated)

• Endodontic timing recommendations

• Follow-up protocol specifications

**Completeness Evaluation Criteria (Weight: 35%)**

• Immediate management steps

• Repositioning techniques (for luxation injuries)

• Splinting protocols

• Pharmacological recommendations

• Pulp vitality monitoring protocols

• Follow-up schedules

**Safety Evaluation Criteria (Weight: 25%)**

**Critical Violations (−2 points each):**

• Recommending replantation of primary teeth

• Prescribing tetracycline-class antibiotics to patients < 12 years

• Recommending unnecessary endodontic treatment in immature teeth

**Total Weighted Score Calculation:**

*Total Score = (Accuracy × 0.40) + (Completeness × 0.35) + (Safety × 0.25)*

Maximum Score: 5.00 points

**Supplementary File 3: Raw Scoring Data**

Complete scoring data from both independent raters and consensus scores for all 162 AI-generated responses (27 scenarios × 3 models × 2 languages).

**Table S3.** Summary Statistics by Model and Language

| **Model** | **Language** | **N** | **Mean** | **SD** |
| --- | --- | --- | --- | --- |
| ChatGPT | English | 27 | 4.856 | 0.142 |
| ChatGPT | Turkish | 27 | 4.431 | 0.188 |
| Gemini | English | 27 | 4.744 | 0.357 |
| Gemini | Turkish | 27 | 4.481 | 0.412 |
| Claude | English | 27 | 4.408 | 0.451 |
| Claude | Turkish | 27 | 4.409 | 0.400 |

**Table S4.** Raw Scores - ChatGPT

| **Sc.** | **Lang** | **Acc R1** | **Acc R2** | **Acc Con** | **Comp R1** | **Comp R2** | **Comp Con** | **Safe R1** | **Safe R2** | **Safe Con** | **Total** |
| --- | --- | --- | --- | --- | --- | --- | --- | --- | --- | --- | --- |
| 1 | Eng | 5.00 | 5.00 | 5.00 | 5.00 | 5.00 | 5.00 | 5.00 | 5.00 | 5.00 | 5.000 |
| 1 | Tur | 4.50 | 5.00 | 4.75 | 4.50 | 4.50 | 4.50 | 4.50 | 4.50 | 4.50 | 4.600 |
| 2 | Eng | 4.50 | 4.50 | 4.50 | 4.50 | 5.00 | 4.75 | 5.00 | 5.00 | 5.00 | 4.713 |
| 2 | Tur | 4.50 | 4.50 | 4.50 | 4.00 | 4.50 | 4.25 | 4.50 | 4.50 | 4.50 | 4.412 |
| 3 | Eng | 5.00 | 5.00 | 5.00 | 5.00 | 5.00 | 5.00 | 5.00 | 5.00 | 5.00 | 5.000 |
| 3 | Tur | 4.50 | 4.50 | 4.50 | 4.50 | 4.50 | 4.50 | 5.00 | 4.50 | 4.75 | 4.563 |
| 4 | Eng | 5.00 | 4.50 | 4.75 | 4.50 | 4.50 | 4.50 | 5.00 | 5.00 | 5.00 | 4.725 |
| 4 | Tur | 4.50 | 4.50 | 4.50 | 4.00 | 4.00 | 4.00 | 4.50 | 5.00 | 4.75 | 4.388 |
| 5 | Eng | 5.00 | 5.00 | 5.00 | 5.00 | 5.00 | 5.00 | 5.00 | 5.00 | 5.00 | 5.000 |
| 5 | Tur | 4.50 | 4.50 | 4.50 | 4.50 | 4.50 | 4.50 | 5.00 | 5.00 | 5.00 | 4.625 |
| 6 | Eng | 5.00 | 5.00 | 5.00 | 4.50 | 4.50 | 4.50 | 5.00 | 5.00 | 5.00 | 4.825 |
| 6 | Tur | 4.00 | 4.50 | 4.25 | 4.00 | 4.00 | 4.00 | 4.50 | 4.50 | 4.50 | 4.225 |
| 7 | Eng | 5.00 | 5.00 | 5.00 | 5.00 | 5.00 | 5.00 | 5.00 | 5.00 | 5.00 | 5.000 |
| 7 | Tur | 4.50 | 4.50 | 4.50 | 4.50 | 5.00 | 4.75 | 5.00 | 5.00 | 5.00 | 4.713 |
| 8 | Eng | 4.50 | 5.00 | 4.75 | 4.50 | 5.00 | 4.75 | 5.00 | 5.00 | 5.00 | 4.813 |
| 8 | Tur | 4.50 | 4.50 | 4.50 | 4.00 | 4.00 | 4.00 | 5.00 | 5.00 | 5.00 | 4.450 |
| 9 | Eng | 5.00 | 5.00 | 5.00 | 5.00 | 5.00 | 5.00 | 5.00 | 5.00 | 5.00 | 5.000 |
| 9 | Tur | 4.50 | 4.50 | 4.50 | 4.50 | 4.50 | 4.50 | 5.00 | 5.00 | 5.00 | 4.625 |
| 10 | Eng | 4.50 | 5.00 | 4.75 | 4.50 | 4.50 | 4.50 | 5.00 | 5.00 | 5.00 | 4.725 |
| 10 | Tur | 4.00 | 4.00 | 4.00 | 4.00 | 4.00 | 4.00 | 4.50 | 4.50 | 4.50 | 4.125 |
| 11 | Eng | 5.00 | 4.50 | 4.75 | 5.00 | 5.00 | 5.00 | 5.00 | 5.00 | 5.00 | 4.900 |
| 11 | Tur | 4.50 | 4.50 | 4.50 | 4.50 | 4.50 | 4.50 | 5.00 | 5.00 | 5.00 | 4.625 |
| 12 | Eng | 5.00 | 4.50 | 4.75 | 4.50 | 4.00 | 4.25 | 5.00 | 5.00 | 5.00 | 4.638 |
| 12 | Tur | 4.00 | 4.00 | 4.00 | 4.00 | 4.50 | 4.25 | 4.50 | 4.50 | 4.50 | 4.213 |
| 13 | Eng | 5.00 | 5.00 | 5.00 | 5.00 | 5.00 | 5.00 | 5.00 | 5.00 | 5.00 | 5.000 |
| 13 | Tur | 4.50 | 4.50 | 4.50 | 4.50 | 4.50 | 4.50 | 4.00 | 4.50 | 4.25 | 4.438 |
| 14 | Eng | 4.50 | 5.00 | 4.75 | 4.50 | 4.50 | 4.50 | 5.00 | 5.00 | 5.00 | 4.725 |
| 14 | Tur | 5.00 | 4.50 | 4.75 | 4.00 | 4.00 | 4.00 | 4.50 | 4.50 | 4.50 | 4.425 |
| 15 | Eng | 5.00 | 5.00 | 5.00 | 5.00 | 5.00 | 5.00 | 5.00 | 5.00 | 5.00 | 5.000 |
| 15 | Tur | 4.50 | 4.50 | 4.50 | 4.50 | 4.50 | 4.50 | 5.50 | 4.00 | 4.75 | 4.563 |
| 16 | Eng | 4.50 | 4.00 | 4.25 | 5.00 | 5.00 | 5.00 | 5.00 | 5.00 | 5.00 | 4.700 |
| 16 | Tur | 4.00 | 4.00 | 4.00 | 4.00 | 4.00 | 4.00 | 4.50 | 4.50 | 4.50 | 4.125 |
| 17 | Eng | 5.00 | 5.00 | 5.00 | 5.00 | 5.00 | 5.00 | 5.00 | 5.00 | 5.00 | 5.000 |
| 17 | Tur | 5.00 | 4.50 | 4.75 | 4.50 | 4.00 | 4.25 | 4.50 | 4.50 | 4.50 | 4.513 |
| 18 | Eng | 5.00 | 4.50 | 4.75 | 4.50 | 5.00 | 4.75 | 5.00 | 5.00 | 5.00 | 4.813 |
| 18 | Tur | 5.00 | 4.50 | 4.75 | 4.00 | 4.00 | 4.00 | 4.50 | 4.50 | 4.50 | 4.425 |
| 19 | Eng | 5.00 | 5.00 | 5.00 | 5.00 | 5.00 | 5.00 | 5.00 | 5.00 | 5.00 | 5.000 |
| 19 | Tur | 4.50 | 4.50 | 4.50 | 4.50 | 4.50 | 4.50 | 4.00 | 4.50 | 4.25 | 4.438 |
| 20 | Eng | 4.50 | 5.00 | 4.75 | 4.50 | 4.50 | 4.50 | 5.00 | 5.00 | 5.00 | 4.725 |
| 20 | Tur | 4.00 | 4.00 | 4.00 | 4.00 | 4.00 | 4.00 | 4.50 | 4.50 | 4.50 | 4.125 |
| 21 | Eng | 5.00 | 5.00 | 5.00 | 5.00 | 5.00 | 5.00 | 5.00 | 5.00 | 5.00 | 5.000 |
| 21 | Tur | 4.50 | 4.50 | 4.50 | 4.50 | 4.50 | 4.50 | 4.50 | 5.00 | 4.75 | 4.563 |
| 22 | Eng | 4.50 | 4.50 | 4.50 | 4.50 | 4.50 | 4.50 | 5.00 | 5.00 | 5.00 | 4.625 |
| 22 | Tur | 4.00 | 4.50 | 4.25 | 4.00 | 4.00 | 4.00 | 4.50 | 4.50 | 4.50 | 4.225 |
| 23 | Eng | 5.00 | 5.00 | 5.00 | 5.00 | 5.00 | 5.00 | 5.00 | 5.00 | 5.00 | 5.000 |
| 23 | Tur | 5.00 | 5.00 | 5.00 | 4.50 | 4.50 | 4.50 | 4.50 | 4.00 | 4.25 | 4.638 |
| 24 | Eng | 4.50 | 4.50 | 4.50 | 4.50 | 4.50 | 4.50 | 5.00 | 5.00 | 5.00 | 4.625 |
| 24 | Tur | 4.50 | 4.00 | 4.25 | 4.00 | 4.00 | 4.00 | 4.50 | 4.50 | 4.50 | 4.225 |
| 25 | Eng | 5.00 | 5.00 | 5.00 | 5.00 | 5.00 | 5.00 | 5.00 | 5.00 | 5.00 | 5.000 |
| 25 | Tur | 4.50 | 4.50 | 4.50 | 4.50 | 4.50 | 4.50 | 5.00 | 5.00 | 5.00 | 4.625 |
| 26 | Eng | 5.00 | 4.50 | 4.75 | 4.50 | 4.50 | 4.50 | 5.00 | 5.00 | 5.00 | 4.725 |
| 26 | Tur | 4.00 | 4.00 | 4.00 | 4.00 | 4.00 | 4.00 | 4.50 | 4.50 | 4.50 | 4.125 |
| 27 | Eng | 5.00 | 5.00 | 5.00 | 4.50 | 4.50 | 4.50 | 5.00 | 5.00 | 5.00 | 4.825 |
| 27 | Tur | 4.50 | 4.50 | 4.50 | 4.50 | 4.50 | 4.50 | 5.00 | 5.00 | 5.00 | 4.625 |

*Sc. = Scenario; Lang = Language (Eng/Tur); Acc = Accuracy; Comp = Completeness; Safe = Safety; R1/R2 = Rater 1/2; Con = Consensus*

**Supplementary File 4: Statistical Analysis Details**

**Inter-Rater Reliability Analysis**

Intraclass correlation coefficients (ICC) were calculated using a two-way random effects model for absolute agreement (ICC[2,1]) across all 162 evaluations. The interpretation follows Koo and Li criteria: < 0.50 = poor, 0.50-0.75 = moderate, 0.75-0.90 = good, > 0.90 = excellent.

**Table S5.** ICC Values with 95% Confidence Intervals

| **Dimension** | **ICC** | **95% CI** | **Interpretation** |
| --- | --- | --- | --- |
| Accuracy | 0.783 | 0.714 - 0.838 | Good |
| Completeness | 0.836 | 0.781 - 0.879 | Good |
| Safety | 0.738 | 0.658 - 0.803 | Moderate |

**Language Effect Analysis**

Wilcoxon signed-rank tests were used to compare paired English and Turkish responses within each model, as the same 27 scenarios were presented in both languages.

**Table S6.** Wilcoxon Signed-Rank Test Results for Language Effects

| **Model** | **English Mean (SD)** | **Turkish Mean (SD)** | **W** | **p-value** | **Effect Size (r)** |
| --- | --- | --- | --- | --- | --- |
| ChatGPT | 4.856 (0.144) | 4.431 (0.191) | 0.0 | < 0.001*** | 0.874 (large) |
| Gemini | 4.744 (0.364) | 4.481 (0.420) | 58.5 | 0.003** | 0.572 (large) |
| Claude | 4.408 (0.459) | 4.409 (0.407) | 138.0 | 0.220 | 0.236 (small) |

****p < 0.001, **p < 0.01. Effect size interpretation: small (r < 0.3), medium (r = 0.3-0.5), large (r > 0.5).*

**Model Comparison Analysis**

Kruskal-Wallis H tests were used to compare performance across the three models. Post-hoc pairwise comparisons were conducted using Mann-Whitney U tests with Bonferroni correction (adjusted α = 0.017).

**Table S7.** Kruskal-Wallis Test Results

| **Comparison** | **H statistic** | **df** | **p-value** |
| --- | --- | --- | --- |
| Overall (both languages) | 11.45 | 2 | 0.003** |
| English only | 22.31 | 2 | < 0.001*** |
| Turkish only | 2.89 | 2 | 0.236 |

**Table S8.** Post-hoc Pairwise Comparisons (Mann-Whitney U)

| **Comparison** | **U statistic** | **p-value** | **Significance** |
| --- | --- | --- | --- |
| ChatGPT vs Gemini | 1388.0 | 0.667 | Not significant |
| ChatGPT vs Claude | 1908.0 | 0.006 | Significant* |
| Gemini vs Claude | 1951.5 | 0.002 | Significant* |

**Significant at Bonferroni-corrected α = 0.017 for three comparisons.*
