# Supplementary material for: Impact of Query Language on Large Language Model Performance in Dental Trauma Management: A Comparative Evaluation of ChatGPT, Gemini, and Claude
Source: Research Square preprint supplement (doi:10.21203/rs.3.rs-8754479/v1), 2026-02-20
Supplement: Supplementary file 3 [file d8482df1326c37c072197ec2.docx]

**Supplementary File: Sample AI Responses**

Complete verbatim AI-generated responses for representative clinical scenarios. Four scenarios were selected to demonstrate performance across varying complexity levels: simple (Scenario 1), moderate (Scenario 3), and complex (Scenarios 18, 21). Each response is presented in full with the corresponding evaluation score.

**SCENARIO 1:** Uncomplicated Crown Fracture (Enamel Infraction)

**ChatGPT**

**English Response | Score: 5.000**

The described injury is an **enamel infraction / uncomplicated enamel fracture** with **no dentin, pulp, or periodontal involvement** and only **physiological mobility**.

### Most appropriate treatment

**No active treatment is required**, aside from conservative management.

### Recommended approach

* **Reassurance and observation**

* **Smooth or polish** the enamel if there are sharp edges

* **Optional resin sealant or bonding** only if:

* There are esthetic concerns

* The crack is visible and at risk of staining

* **Routine follow-up** to monitor pulp vitality (usually remains normal)

* **No splinting, endodontic therapy, or antibiotics** indicated

### Rationale

* Enamel-only cracks do not compromise pulp vitality

* Physiological mobility is normal and not trauma-related

* Absence of periodontal injury eliminates need for stabilization

**Summary:**

👉 *Conservative management with smoothing/polishing and observation is the treatment of choice.*

**Evaluator Note:** *Mine infraksiyon tedavisi IADT uyumlu; takip aralıkları eksik ama temel yaklaşım mükemmel.*

**Turkish Response | Score: 4.600**

Tanımlanan tablo **komplike olmayan mine kırığı (enamel fracture) + hafif travmatik mobilite (subluksasyon)** ile uyumludur. Dentin ve pulpa etkilenmediği, periodontal dokularda yaralanma olmadığı için tedavi konservatif olmalıdır.

**En uygun tedavi yaklaşımı:**

1. **Aktif restoratif veya endodontik tedavi gerekmez**

* Sadece mine kırığı olduğu için pulpa tedavisi veya dolgu zorunlu değildir.

* Keskin kenarlar varsa **mine polisajı** yapılır.

* Estetik veya fonksiyonel gereksinim varsa **kompozit rezinle minimal restorasyon** yapılabilir (opsiyonel).

2. **Mobilite için yaklaşım**

* Hafif mobilite (subluksasyon) varlığında **splintleme genellikle gerekmez**.

* Oklüzal travma varsa **oklüzal ayarlama** yapılabilir.

3. **Takip ve izlem**

* Pulpa vitalitesi başlangıçta ve takiplerde kontrol edilmelidir.

* Klinik ve radyografik kontroller önerilir (ör. 2–4 hafta, 6–8 hafta).

4. **Hasta bilgilendirmesi**

* Sert gıdalardan kaçınma

* Travmatize dişi zorlamama

* Olası semptomlar (ağrı, renk değişimi) konusunda uyarı

**Özet:**

Bu durumda **konservatif yaklaşım + polisaj (gerektiğinde minimal restorasyon) + klinik takip** en uygun tedavidir.

**Evaluator Note:** *Mine kırığı + subluksasyon değerlendirmesi doğru; konservatif yaklaşım IADT uyumlu, takip aralıkları belirtilmiş.*

**Gemini**

**English Response | Score: 4.625**

Based on the clinical presentation described, the patient has sustained an **Enamel Infraction**. This is an incomplete fracture (crack) of the enamel without the loss of tooth substance and without involvement of the underlying dentin or pulp.

Because the tooth exhibits only **physiological mobility** (which is normal) and there is **no injury to the periodontal tissues**, the treatment approach is conservative.

---

### Recommended Treatment Approach

For an enamel infraction, the primary goal is to prevent the crack from becoming a portal for bacteria or staining and to monitor the health of the pulp over time.

1. **Sealing (Optional but Recommended):**

* If the infraction is distinct or deep, the surface should be etched and sealed with a **clear resin (bond)**. This prevents the crack from absorbing stains and potentially protects against bacterial micro-leakage.

* If the crack is extremely faint and the patient is asymptomatic, no immediate restorative treatment may be necessary.

2. **No Splinting Required:**

* Since the mobility is physiological and the periodontal tissues are intact, there is no indication for splinting or stabilization.

3. **Baseline Vitality Testing:**

* Perform a baseline pulp sensibility test (e.g., cold test or EPT). Note that teeth may provide a false negative immediately after trauma; this baseline is used for comparison during follow-up.

---

### Clinical Monitoring and Follow-up

While the injury is minor, the IADT (International Association of Dental Traumatology) guidelines suggest monitoring to ensure the pulp remains vital.

| Timeline | Action |

| --- | --- |

| **6–8 Weeks** | Clinical examination and sensibility testing. |

| **1 Year** | Clinical examination and sensibility testing. |

### Summary of Rationale

* **Conservative Nature:** Because no tooth structure was lost and the attachment apparatus (periodontium) is healthy, the prognosis is excellent.

* **Aesthetic Preservation:** Sealing the crack early prevents the "dark line" that can occur if coffee, tea, or tobacco stains infiltrate the infraction over time.

Would you like me to outline the specific symptoms that would indicate the pulp has become necrotic during the follow-up period?

**Evaluator Note:** *Mine infraksiyon tedavisi IADT uyumlu; rezin sealant önerisi ve takip protokolü (6-8 hafta, 1 yıl) doğru.*

**Turkish Response | Score: 4.537**

Bu klinik tablo, dental travmatoloji literatüründe **"Mine Kırığı"** (Enamel Fracture) ve muhtemelen hafif mobilite nedeniyle eşlik eden bir **"Sublüksasyon"** (yarı çıkık) vakası olarak değerlendirilir.

Dentin veya pulpanın etkilenmediği bu tür vakalarda yaklaşım oldukça konservatiftir. İşte en uygun tedavi adımları:

### 1. Mine Kırığının Tedavisi

Kırığın boyutu ve hastanın estetik beklentisine göre iki yol izlenir:

* **Minesel Düzeltme (Mölleme):** Eğer kırık çok küçükse ve estetiği bozmuyorsa, keskin kenarların aşındırılıp parlatılması yeterlidir.

* **Restorasyon:** Eğer estetik bir kayıp varsa, kompozit rezin (dolgu) ile restorasyon yapılır. Eğer hastanın kırık parçası yanındaysa, bu parça da dişe yapıştırılabilir (re-ataşman).

### 2. Mobilitenin (Sarsıntının) Yönetimi

Dişteki hafif mobilite, periodontal ligamanın (dişi kemiğe bağlayan lifler) travmadan etkilendiğini gösterir.

* **Gözlem:** Hafif mobilitede genellikle splint (dişleri birbirine bağlama) gerekmez.

* **Yumuşak Diyet:** Hastaya 1-2 hafta boyunca yumuşak gıdalarla beslenmesi ve travmalı bölgeyi zorlamaması önerilir.

* **Hijyen:** Bölgenin temiz tutulması için yumuşak bir fırça ve gerekirse klorheksidinli gargaralar önerilebilir.

### 3. Takip Protokolü (En Kritik Adım)

Mine kırıkları basit görünse de, travmanın şiddeti dişin sinirini (pulpa) ilerleyen süreçte etkileyebilir. Uluslararası Dental Travmatoloji Derneği (IADT) protokollerine göre takip randevuları planlanmalıdır:

* **Klinik Takip:** 6-8 hafta ve 1 yıl sonra kontrol.

* **Vitalite Testleri:** Dişin canlılığının (soğuk testi veya elektrikli pulpa testi ile) korunup korunmadığı kontrol edilmelidir.

* **Radyolojik Kontrol:** Kök ucunda herhangi bir patoloji gelişip gelişmediği izlenmelidir.

---

**Özetle:** En uygun yaklaşım; keskin kenarların düzeltilmesi veya estetik restorasyonun yapılması, hastaya yumuşak diyet önerilmesi ve dişin canlılığının periyodik olarak takip edilmesidir.

Bu vaka için spesifik bir **takip çizelgesi** veya **restorasyon teknikleri** hakkında daha detaylı bilgi ister misiniz?

**Evaluator Note:** *Mine kırığı ve subluksasyon yönetimi doğru, konservatif yaklaşım ve takip protokolü tam, güvenlik uyarıları mevcut.*

**Claude**

**English Response | Score: 4.162**

Based on the clinical presentation described—a fracture confined to the enamel only, with no dentin or pulp involvement, slight physiological mobility, and no periodontal injury—this represents an **enamel infraction** (or craze line).

## Most Appropriate Treatment Approach:

**Conservative management with monitoring** is the treatment of choice:

### Immediate Management:

- **No active intervention required** if the fracture is asymptomatic

- **Smooth any sharp edges** if present, to prevent soft tissue irritation

- **Reassure the patient** about the benign nature of the injury

### Follow-up Care:

- **Clinical monitoring** at regular intervals (initially at 6-8 weeks, then at 6 months and 1 year)

- **Pulp vitality testing** at follow-up visits to ensure no delayed pulp complications

- **Radiographic examination** if any symptoms develop

### Patient Education:

- Inform the patient about signs/symptoms to watch for (sensitivity, pain, discoloration)

- Advise avoiding excessive biting forces on the affected tooth temporarily

- Emphasize the importance of good oral hygiene

### Optional Considerations:

- **Sealant application** over the crack may be considered to prevent stain penetration and to seal the fracture line

- **Composite resin restoration** only if aesthetics are a concern to the patient

## Rationale:

Since the fracture is limited to enamel with no pulp or dentin involvement, and periodontal tissues are intact, there is no immediate biological concern. The slight physiological mobility is normal and doesn't indicate periodontal trauma. Most enamel infractions remain asymptomatic and require only observation to ensure no progression or complications develop.

**Evaluator Note:** *Enamel infraction yönetimi doğru, konservatif yaklaşım uygun; ancak IADT takip protokolü (6-8 hafta, 1 yıl) tam belirtilmemiş, sealant opsiyonel.*

**Turkish Response | Score: 3.650**

Mine kırığı (enamel fracture) olan bir hastada tedavi yaklaşımı şöyle olmalıdır:

## Acil Dönem Tedavisi

**1. Kırık Kenarların Düzeltilmesi**

- Keskin mine kenarları disk veya frez ile düzeltilir (konturlama)

- Bu hem estetik hem de yumuşak doku yaralanmalarını önler

**2. Mobilite Değerlendirmesi**

- Hafif mobilite varlığında **luksasyon** olasılığı düşünülmelidir

- Bu durumda kırık sadece mine kırığı olmaktan çıkar, aynı zamanda periodontal hasar da vardır

## Tedavi Seçenekleri

**Mobilite yoksa veya çok hafifse:**

- Sadece keskin kenarların düzeltilmesi yeterlidir

- Kırık büyükse, estetik için kompozit rezin restorasyonu yapılabilir

- Takip önerilir

**Mobilite mevcutsa (sizin vakada olduğu gibi):**

- **Splintleme düşünülmelidir** (7-14 gün esnek splint)

- Oklüzal travmadan koruma

- Yumuşak diyet önerisi

- Soğuk kompres (ilk 24 saat)

## Takip Protokolü

- **İlk kontrol:** 1 hafta sonra

- **Uzun dönem takip:** 1, 3, 6 ve 12. aylarda

- **Kontroller:**

- Vitalite testleri (pulpa nekrozu riski açısından)

- Radyografik değerlendirme

- Mobilite kontrolü

- Renk değişikliği takibi

## Uyarılar

Mobilite varlığı, travmanın sadece mine ile sınırlı olmadığını, **periodontal ligamentin de etkilendiğini** gösterir. Bu nedenle hasta mutlaka travma protokolü ile takip edilmelidir.

**Evaluator Note:** *Mine kırığında konservatif yaklaşım doğru; ancak hafif mobilite için splint önermesi sorunlu - IADT mine kırığında splint gerektirmez. Takip süresi belirsiz.*

**SCENARIO 3:** Complicated Crown Fracture (Pulp Exposure)

**ChatGPT**

**English Response | Score: 5.000**

**Short answer:**

**No. Emergency root canal treatment (RCT) is not indicated** in this situation.

**Rationale:**

* The tooth is **vital** and **responds positively to cold**, indicating **reversible pulp status**.

* Root development is **complete**, but vitality should still be preserved when possible.

* Crown-root fractures with pulp exposure are not, by themselves, an indication for immediate RCT.

---

## Recommended Treatment Protocol (Emergency Management)

### 1. **Vital pulp therapy (treatment of choice)**

The goal is to maintain pulp vitality and function.

* **Preferred option:** **Partial pulpotomy (Cvek pulpotomy)**

* Indicated for traumatic pulp exposures in vital permanent teeth.

* Remove 1–2 mm of inflamed pulp tissue.

* Achieve hemostasis with sterile saline or NaOCl.

* Place a **biocompatible pulp dressing**:

* **MTA or Biodentine** (preferred)

* Calcium hydroxide is acceptable but less ideal.

* **Alternative:** **Direct pulp capping**

* Only if exposure is very small, recent, and bleeding is easily controlled.

---

### 2. **Management of the crown-root fracture**

* Assess fracture extent (often requires flap elevation).

* Temporarily **stabilize the coronal fragment** if present.

* Ensure a **restorable margin** (may require gingivectomy or orthodontic extrusion later).

---

### 3. **Definitive restoration**

* Seal the tooth promptly with a well-sealed temporary or definitive restoration.

* Plan definitive restorative care once periodontal and restorative conditions are favorable.

---

### 4. **Follow-up**

* Clinical and radiographic monitoring at 6–8 weeks, then periodically.

* **RCT is only indicated later** if signs of:

* Irreversible pulpitis

* Pulp necrosis

* Periapical pathology

---

## Summary

* **Emergency RCT:** ❌ Not indicated

* **Emergency treatment:** ✅ Vital pulp therapy (partial pulpotomy preferred)

* **Goal:** Preserve pulp vitality and defer RCT unless pathology develops

If you want, I can also outline **decision criteria for when RCT *would* be indicated** in traumatic crown-root fractures.

**Evaluator Note:** *Vital pulpa tedavisi doğru; parsiyel pulpotomi önerisi IADT uyumlu, takip protokolü tam.*

**Turkish Response | Score: 4.563**

Özetle: **acil kanal tedavisi endikasyonu yoktur**, ancak **acil vital pulpa tedavisi endikasyonu vardır**.

Aşağıda gerekçe ve doğru tedavi protokolü yer almaktadır.

---

## Klinik değerlendirme

* **Daimi diş, kök gelişimi tamamlanmış**

* **Soğuk testine pozitif yanıt → pulpa vital**

* **Pulpa ekspozisyonu olan kuron-kök kırığı**

* Travmaya bağlı **mekanik pulpa açılması** söz konusudur

* Enfeksiyon bulgusu veya irreversibl pulpitis kanıtı yok

Bu bulgular, pulpanın **korunabilir** olduğunu gösterir.

---

## Kanal tedavisi açısından endikasyon

**Acil kanal tedavisi endikasyonu yoktur.**

Kanal tedavisi ancak şu durumlarda endikedir:

* Spontan ağrı

* Uzamış termal ağrı

* Negatif vitalite testleri

* Radyografik patoloji

* Kontamine veya tedavi edilemeyecek düzeyde pulpa hasarı

Bu olguda bu kriterler karşılanmamaktadır.

---

## Doğru tedavi yaklaşımı

### 1. Acil tedavi: **Vital pulpa tedavisi**

Pulpa ekspozisyonu olduğundan **indirekt tedavi yeterli değildir**. Tercih:

### 🔹 **Parsiyel pulpotomi (Cvek pulpotomisi)**

(tercihen ilk seçenek)

Alternatif (çok küçük ve temiz ekspozisyonda):

* **Direkt pulpa örtülmesi**

---

## Tedavi protokolü (Parsiyel pulpotomi)

1. **Lokal anestezi**

2. **Rubber dam izolasyonu**

3. Ekspoze pulpadan yaklaşık **1–2 mm** inflame doku uzaklaştırılır

4. **Hemostaz sağlanır**

* Steril salin veya %1–5 NaOCl

* 5 dakikada hemostaz sağlanamıyorsa prognoz kötüleşir

5. Pulpa üzerine biyouyumlu materyal:

* **MTA** (altın standart)

* veya **Biodentine**

6. Üzerine:

* Cam iyonomer / rezin modifiye GİC

7. **Koronal restorasyon**

* Kırık hattı subgingival ise cerrahi/ortodontik yaklaşım planlanır

8. **Takip**

* 6 hafta, 3 ay, 6 ay, 1 yıl

* Vitalite testleri ve radyografik kontrol

---

## Prognoz

* Zamanında ve doğru uygulanırsa **başarı oranı çok yüksektir**

* Pulpa vitalitesi korunur

* İleride kanal tedavisi gerekmeyebilir

---

### Sonuç cümlesi (sınav tarzı):

> Kök gelişimini tamamlamış, vital, pulpa ekspozisyonu olan kuron-kök kırığında **acil kanal tedavisi endikasyonu yoktur**; **acil vital pulpa tedavisi (tercihen parsiyel pulpotomi)** endikedir.

İstersen bunu **TUS / DUS / uzmanlık sınavı** formatında kısa algoritma hâline de getirebilirim.

**Evaluator Note:** *Vital pulpa tedavisi endikasyonu tam doğru; parsiyel pulpotomi önerisi ve MTA/Biodentine kullanımı IADT uyumlu.*

**Gemini**

**English Response | Score: 4.000**

In the case of a **crown-root fracture with pulp exposure** in a mature permanent tooth, the clinical priority is managing the exposed pulp and addressing the subgingival extent of the fracture.

### Is Emergency Root Canal Treatment Indicated?

**Yes.** While vital pulp therapy (like a partial pulpotomy) is an option for immature teeth to allow for root completion, for a **mature tooth** with a crown-root fracture, **Root Canal Treatment (RCT)** is generally the treatment of choice.

The primary reason is not just the pulp exposure itself, but the **restorative requirement**. Because the fracture extends below the gingival margin (root portion), the tooth will likely require a post-retained restoration, crown lengthening, or orthodontic extrusion to create a proper marginal seal. These procedures are significantly more predictable and manageable once the tooth has undergone RCT.

---

### Treatment Protocol

The management of crown-root fractures is complex because it involves endodontic, periodontal, and restorative considerations.

#### 1. Emergency Phase (Immediate Care)

* **Pain Management:** Provide local anesthesia.

* **Pulpal Debridement:** If time permits, perform a full **pulpectomy** (removal of the entire pulp) to relieve pain and prevent infection. If time is limited, a **partial pulpotomy** (Cvek pulpotomy) can be performed as a temporary sedative measure using Calcium Hydroxide or MTA.

* **Temporary Stabilization:** If the crown fragment is still present and stable, it can be temporarily bonded to adjacent teeth to provide comfort and aesthetics.

#### 2. Assessment and Planning

* **Radiographic Evaluation:** Take multiple angles (periapical and potentially a CBCT) to determine the apical extent of the fracture.

* **Determine Restorability:** If the fracture extends too far apically (e.g., into the middle or apical third of the root), the tooth may be non-restorable and extraction would be indicated.

#### 3. Definitive Treatment Options

Once the RCT is completed, the "biological width" must be respected to ensure periodontal health. There are four main approaches to managing the subgingival margin:

* **Fragment Reattachment:** If the fracture is shallow and the fragment is intact, it can be reattached using resin bonding after the RCT.

* **Gingivectomy and Ostectomy:** Surgically removing a small amount of gum and bone to expose the fracture margin, allowing for a proper restoration.

* **Orthodontic Extrusion:** Using braces to "pull" the tooth further out of the socket so the fracture line becomes supragingival (above the gum line).

* **Surgical Extrusion:** Physically loosening the tooth and repositioning it more coronally in the socket.

#### 4. Final Restoration

* **Post and Core:** Since crown-root fractures often involve significant loss of tooth structure, a fiber or metal post is usually placed within the root canal to provide retention for the core.

* **Permanent Crown:** A full-coverage crown is usually necessary to protect the tooth from further fracture and ensure a long-term seal.

---

### Summary Table: Treatment Logic

| Factor | Clinical Decision |

| --- | --- |

| **Pulp Status** | Vital, but exposed; needs RCT for restorative access. |

| **Root Development** | Completed; no need for apexogenesis/apexification. |

| **Fracture Location** | Subgingival; requires surgical or orthodontic intervention to expose margins. |

| **Prognosis** | Good, provided the fracture does not extend too deep into the root. |

Would you like me to go into more detail regarding the specific materials used for pulp capping versus permanent obturation in these trauma cases?

**Evaluator Note:** *KKT önerisi tartışmalı; IADT vital pulpa tedavisini (parsiyel pulpotomi) öncelikli görür. Acil KKT endikasyonu yanlış yorumlanmış.*

**Turkish Response | Score: 3.662**

Kök gelişimi tamamlanmış (matür) ve vital bir dişte meydana gelen **pulpa ekspozisyonlu kuron-kök kırığı**, hem endodontik hem de restoratif açıdan komplike bir durumdur.

Bu durumda "acil kanal tedavisi" her zaman tek seçenek değildir; ancak restoratif planlama ve hastanın ağrı durumu tedavi protokolünü belirler.

### 1. Acil Kanal Tedavisi Endikasyonu Var mı?

**Tam olarak bir "acil" zorunluluk yoktur**, ancak çoğu vakada **kesin tedavi planının bir parçasıdır.**

* **Pulpa Vitalitesi:** Diş vital olduğu için, eğer ekspozisyon çok küçükse ve hasta travmadan hemen sonra (ilk 24 saat) başvurduysa, pulpa vitalitesini korumak adına **parsiyel pulpotomi (Cvek pulpotomisi)** denenebilir.

* **Restoratif Gereklilik:** Kuron-kök kırıklarında kırık hattı genellikle diş eti sınırının altına (subgingival) iner. Bu durum, izolasyonu imkansız hale getirir. Dişin restorasyonu için cerrahi kron boyu uzatma veya ortodontik ekstrüzyon gerekeceği için, matür dişlerde genellikle **kanal tedavisi (pulpektomi)** yapılması en öngörülebilir yaklaşımdır.

---

### 2. Tedavi Protokolü

Kuron-kök kırıklarında tedavi, kırık hattının derinliğine ve parçanın durumuna göre basamaklı olarak ilerler:

#### A. Acil Müdahale Aşaması

1. **Ağrı Kontrolü ve Stabilizasyon:** Eğer kırık parça hala ağızdaysa ve sallanıyorsa, hastanın konforu için parça mobilize edilip geçici olarak kompozit rezin ile yandaki dişlere sabitlenebilir veya parça çıkarılıp pulpa örtülebilir.

2. **Parçanın Değerlendirilmesi:** Kırık parça bütün halindeyse, reattachment (tekrar yapıştırma) seçeneği için serum fizyolojik içinde saklanmalıdır.

#### B. Endodontik Tedavi (Pulpektomi)

Kök gelişimi tamamlandığı için apeksifikasyon gerekmez.

* Kırık hattı subgingivalde ise izolasyon (rubber-dam) sağlamak için önce diş eti eksize edilebilir veya koter kullanılabilir.

* Kanal tedavisi standart prosedürle tamamlanır.

#### C. Kırık Hattının Açığa Çıkarılması (Restoratif Hazırlık)

Kuron-kök kırıklarındaki en büyük sorun biyolojik genişliğin ihlalidir. Şu yöntemlerden biri seçilir:

* **Gingivektomi/Osteotomi:** Kırık hattı sığ ise cerrahi olarak diş eti ve gerekirse kemik seviyesi düşürülür.

* **Ortodontik Ekstrüzyon:** Kırık hattı derindeyse, diş ortodontik olarak yukarı çekilir (estetik bölgede tercih edilir).

* **Cerrahi Ekstrüzyon (İntraalveoler Transplantasyon):** Diş lükse edilip daha koronal bir pozisyona yerleştirilir.

#### D. Restorasyon

* Kanal tedavisi sonrası dişe **post-core** uygulaması yapılarak dişin retansiyonu artırılır.

* Ardından daimi kuron restorasyonu yapılır.

---

### Özet Karar Tablosu

| Durum | Tercih Edilen Yaklaşım |

| --- | --- |

| **Kırık hattı supragingival (diş eti üstü)** | Parsiyel Pulpotomi veya Kanal Tedavisi + Direkt Restorasyon |

| **Kırık hattı subgingival (diş eti altı)** | Kanal Tedavisi + Kron Boyu Uzatma + Post-Core |

| **Estetik bölge, derin kırık** | Kanal Tedavisi + Ortodontik Ekstrüzyon + Kuron |

**Sonuç olarak:** Acil aşamada amaç ağrıyı dindirmek ve pulpayı korumaktır. Ancak kök gelişimi tamamlanmış bir dişte, kuron-kök kırığının getirdiği teknik zorluklar nedeniyle **kanal tedavisi genellikle en güvenli ve nihai yoldur.**

Kırık hattının diş eti sınırının ne kadar altında olduğunu (radyografik veya sondalama ile) belirlediniz mi? İsterseniz bu derinliğe göre hangi cerrahi yöntemin daha uygun olabileceğini tartışabiliriz.

**Evaluator Note:** *Matür vital dişte pulpotomi tercihi doğru ancak IADT endodontik zamanlama belirsiz; kron-kök kırığında cerrahi uzatma ihtiyacı eksik detaylandırılmış.*

**Claude**

**English Response | Score: 2.837**

Given this clinical scenario, **yes, there is an indication for emergency root canal treatment**, but the specific protocol depends on the extent of the fracture.

## Clinical Assessment First

You need to determine:

- **Fracture extent**: How far apically does the fracture extend subgingivally?

- **Restorability**: Can the tooth be restored after crown lengthening/orthodontic extrusion?

- **Periodontal assessment**: Is the fracture invading the biological width significantly?

## Emergency Treatment Protocol

**Immediate management (first visit):**

1. **Pulp extirpation**: Remove the coronal and radicular pulp tissue to eliminate the inflamed/exposed pulp as a source of pain and infection

2. **Cleaning and shaping**: Complete or near-complete root canal preparation to reduce bacterial load

3. **Intracanal medication**: Place calcium hydroxide as an interappointment dressing (antimicrobial, promotes healing)

4. **Temporary restoration**: Seal the access cavity properly

5. **Fragment management**:

- Remove any mobile coronal fragments

- If a subgingival fragment is stable and not impinging on periodontal tissues, it may be temporarily retained

**Definitive treatment (subsequent visit, typically 1-2 weeks later):**

1. Complete root canal obturation with gutta-percha and sealer

2. Address the fracture:

- **Surgical crown lengthening** or **orthodontic extrusion** if the fracture extends subgingivally

- Post and core if significant tooth structure loss

- Final restoration (crown)

## Key Consideration

The positive response to cold testing confirms vitality but also indicates the pulp is likely inflamed from exposure. Prompt extirpation prevents progression to necrosis and apical pathology, while preserving the restorability of the tooth through proper fracture management.

**Evaluator Note:** *Acil KKT önerisi sorunlu; IADT vital matür dişte bile konservatif pulpa tedavisini (parsiyel pulpotomi) öncelikli önerir. Pulpa korunması vurgulanmamış.*

**Turkish Response | Score: 4.737**

Kök gelişimini tamamlamış, vital ve soğuk testine pozitif yanıt veren bir daimi dişte pulpa ekspozisyonu olan kuron-kök kırığı durumunda **acil kanal tedavisi mutlak bir endikasyon değildir**. Tedavi yaklaşımı kırığın lokalizasyonuna ve pulpal duruma göre şekillendirilmelidir.

## Tedavi Protokolü

**İlk Değerlendirme:**

- Kırığın yerini ve genişliğini belirleyin (klinik ve radyografik)

- Kırık hattının gingivaya ve kemik kretine olan ilişkisini değerlendirin

- Pulpa ekspozisyonunun boyutunu ve kontaminasyon süresini değerlendirin

**Tedavi Seçenekleri:**

**1. Vital Pulpa Tedavileri (Öncelikli yaklaşım)**

- **Pulpa kapama:** Minimal ekspozisyon (<1mm), temiz yara, kısa süre geçmiş (<24 saat)

- Kalsiyum hidroksit veya MTA/Biodentine ile direkt pulpa kapama

- Cam iyonomer ile geçici restorasyonu tamamlayın

- **Parsiyel pulpotomi:** Daha geniş ekspozisyon veya kontamine pulpa

- 2mm pulpal doku uzaklaştırılır

- MTA/Biodentine ile kapama

- Vital pulpa korunur, endikasyon yoksa kanal tedavisine gerek yok

**2. Kanal Tedavisi Endikasyonları:**

- Vital pulpa tedavilerinin başarısız olması

- İrreversible pulpitis bulguları gelişmesi

- Kırık hattının subgingival/kemik altı olması ve restoratif olarak çözümlenememesi

- Geniş pulpa ekspozisyonu (>2mm) ve uzun süre kontaminasyon

**3. Takip Protokolü:**

- İlk hafta kontrol (semptom değerlendirme)

- 1, 3, 6 ve 12 aylık klinik-radyografik kontrol

- Vitalite testleri düzenli yapılmalı

- Periapikal patoloji gelişimi veya semptomlar ortaya çıkarsa kanal tedavisine geçilir

**Sonuç:** Vital bir dişte acil endikasyon yoktur, önce pulpayı koruyucu yaklaşımlar denenmeli, başarısız olursa kanal tedavisine geçilmelidir.

**Evaluator Note:** *Acil KKT mutlak endikasyon olmadığı vurgulanmış, vital pulpa tedavileri öncelikli gösterilmiş - IADT ile tam uyumlu.*

**SCENARIO 18:** Avulsion - Immature Tooth, Short Dry Time (<20 min)

**ChatGPT**

**English Response | Score: 4.813**

This is a **replanted avulsed permanent incisor with an open apex that has been positioned incorrectly**. Management follows the IADT trauma guidelines.

### Key considerations

* Age 8 → **immature permanent incisor (open apex)**

* Tooth was **avulsed and immediately replanted** → periodontal ligament cells likely viable

* Seen **2 hours later** → still early

* **Incorrect positioning** → must be corrected promptly

### Recommended treatment protocol

1. **Local anesthesia**

* Use anesthesia **without vasoconstrictor** if possible.

2. **Careful removal and repositioning**

* **Gently remove the tooth**.

* Rinse with **saline only** if contaminated (do not scrape or dry).

* **Replant immediately in correct anatomical position** using light digital pressure.

3. **Verify position**

* Clinical and radiographic confirmation of correct alignment.

4. **Flexible splinting**

* Apply a **passive flexible splint** (wire/composite or fiber splint).

* **Duration: 2 weeks**.

5. **Medications**

* **Systemic antibiotics**:

* Amoxicillin (first choice in children)

* Doxycycline is avoided in young children

* **Check tetanus status** and refer if needed.

* **Chlorhexidine mouth rinse** (0.12%) twice daily for 1 week.

6. **Post-operative instructions**

* Soft diet for 1–2 weeks

* Avoid biting on the tooth

* Maintain good oral hygiene

7. **Pulp management**

* Because the tooth is **immature**, **do NOT initiate immediate root canal treatment**.

* Aim for **pulp revascularization**.

* Monitor closely for signs of pulp necrosis or inflammatory resorption.

8. **Follow-up schedule**

* 2 weeks (splint removal)

* 4 weeks

* 3 months

* 6 months

* Yearly for at least 5 years

### If complications develop

* If pulp necrosis or inflammatory root resorption is detected → initiate **apexification or regenerative endodontic treatment**.

**Summary:**

The tooth should be **removed and immediately replanted correctly**, followed by **2 weeks of flexible splinting**, antibiotics, tetanus evaluation, and **close monitoring without immediate endodontic treatment** due to the open apex.

**Evaluator Note:** *İmmatür diş replantasyonu protokolü tam; 2 hafta splint, amoksisilin, revaskülarizasyon takibi doğru.*

**Turkish Response | Score: 4.425**

Bu olgu **IADT (International Association of Dental Traumatology) kılavuzlarına göre** yönetilmelidir. Temel belirleyiciler:

* **Daimi diş**,

* **Hasta 8 yaşında → büyük olasılıkla açık apeks**,

* **Diş olay yerinde hemen replante edilmiş (ekstraoral kuru süre yok/çok kısa)**,

* **Klinikte 2 saat sonra ve replante pozisyonu hatalı**.

---

## Tedavi Protokolü

### 1. Lokal anestezi altında dişin yeniden konumlandırılması

* Diş **soketten dikkatlice çıkarılır** (PDL’ye minimal travma).

* Soket **steril serum fizyolojik ile nazikçe yıkanır** (küretaj yapılmaz).

* Diş **anatomik olarak doğru pozisyonda yeniden replante edilir**.

* Oklüzyon kontrol edilir.

### 2. Splintleme

* **Esnek (fleksibl) splint** uygulanır.

* **Süre: 2 hafta**

(Tel-kompozit veya fiber splint; rijit splintten kaçınılır).

### 3. Sistemik destek

* **Antibiyotik tedavisi**

* İlk tercih: **Amoksisilin**

* Penisilin alerjisinde: **Doksisiklin** (yaş uygunluğu dikkate alınarak)

* **Tetanoz profilaksisi** (gerekirse hekim konsültasyonu).

* **%0,1–0,2 klorheksidin** ile ağız gargarası (1 hafta).

* Yumuşak diyet ve iyi oral hijyen önerilir.

### 4. Pulpa yönetimi (kritik nokta)

* Diş **açık apeksli** olduğu için:

* **Rutin olarak hemen kanal tedavisi yapılmaz.**

* Amaç: **revaskülarizasyonun izlenmesi**.

* Klinik ve radyografik takip:

* Pulpa nekrozu veya enfeksiyon bulguları gelişirse →

**kalsiyum hidroksit veya MTA ile apeksifikasyon / rejeneratif yaklaşım** değerlendirilir.

### 5. Takip

* **2 hafta (splint kaldırma)**

* **4 hafta, 3 ay, 6 ay, 1 yıl ve yıllık kontroller**

* Ankiloz, rezorpsiyon ve pulpa vitalitesi izlenir.

---

### Özet

Bu vakada doğru yaklaşım:

**Hatalı replante edilmiş dişi çıkarıp doğru pozisyonda yeniden replante etmek, 2 hafta fleksibl splintlemek, sistemik destek sağlamak ve açık apeks nedeniyle pulpayı izlemeye almak**tır.

**Evaluator Note:** *İmmatür diş replantasyonu protokolü tam; 2 hafta splint, amoksisilin, revaskülarizasyon takibi IADT uyumlu.*

**Gemini**

**English Response | Score: 5.000**

This is a critical clinical situation, but the fact that the tooth was **immediately replanted** at the scene gives it the best possible long-term prognosis, despite the current malposition.

Because the patient is 8 years old, the permanent central incisor (#11) likely has an **open apex**, which significantly changes the endodontic approach compared to an adult.

According to the **International Association of Dental Traumatology (IADT)** guidelines, here is the recommended treatment protocol:

---

### 1. Immediate Clinical Management

Since the tooth is not anatomically correct, you must reposition it to ensure proper healing of the periodontal ligament (PDL) and alveolar bone.

* **Local Anesthesia:** Administer local anesthetic (avoiding or minimizing vasoconstrictors near the apex if possible).

* **Repositioning:** Gently adjust the tooth into its correct anatomical position using light digital pressure. If there is a blood clot preventing seating, you may need to gently irrigate the socket with saline, but avoid curettage of the socket wall to preserve viable PDL cells.

* **Verification:** Confirm the position clinically and radiographically.

### 2. Stabilization (Splinting)

* **Type:** Apply a **flexible splint** (e.g., orthodontic wire up to 0.016" or high-test nylon fishing line bonded with composite).

* **Duration:** The splint should remain for **2 weeks**.

* **Note:** Rigid splinting is contraindicated as it increases the risk of replacement resorption (ankylosis).

### 3. Adjunctive Therapy

* **Antibiotics:** Systemic antibiotics are recommended to prevent infection during the initial healing phase.

* For a child under 12: **Amoxicillin** or **Penicillin V** (dosing based on weight).

* **Tetanus Prophylaxis:** Refer the patient to their pediatrician to verify if a tetanus booster is required (especially if the avulsion occurred in a "dirty" environment).

* **Chlorhexidine Rinse:** Prescribe 0.12% Chlorhexidine mouthwash twice daily for one week to help with plaque control while the area is tender.

---

### 4. Endodontic Considerations (The Open Apex)

At age 8, the goal for tooth #11 is **pulp revascularization**.

* **Do not initiate root canal therapy (RCT) immediately.** Because the apex is likely open and the tooth was replanted quickly, there is a chance the blood supply will re-establish.

* **Monitoring:** Perform clinical and radiographic follow-ups at 2 weeks, 4 weeks, 3 months, 6 months, and 1 year.

* **Infection:** If you see signs of pulp necrosis or inflammatory resorption (e.g., periapical lucency, inflammatory root resorption), RCT or apexification/revascularization procedures must begin immediately.

---

### Summary Checklist for the Patient/Parent

| Action | Instruction |

| --- | --- |

| **Diet** | Soft food for up to 2 weeks. |

| **Hygiene** | Use a soft toothbrush after every meal; use the prescribed rinse. |

| **Warning Signs** | Contact the clinic if the tooth becomes mobile, painful, or if a "pimple" (parulis) appears on the gum. |

Would you like me to provide a specific follow-up schedule or the radiographic signs you should look for during the first 6-month review?

**Evaluator Note:** *İmmatür diş replantasyonu protokolü tam; 2 hafta splint, amoksisilin, revaskülarizasyon takibi IADT uyumlu.*

**Turkish Response | Score: 4.263**

8 yaşındaki bir hastada üst çene sağ orta kesici dişin (11 numara) avülsiyonu ve sonrasında hatalı pozisyonda da olsa hemen replante edilmesi, prognoz açısından aslında oldukça avantajlı bir durumdur. Dişin dış ortamda kalma süresinin minimal olması, periodontal ligament (PDL) hücrelerinin canlılığının korunması adına en kritik faktördür.

Ancak dişin anatomik olarak yanlış konumlandırılmış olması, oklüzyon ve estetik açıdan müdahaleyi gerektirir. IADT (Uluslararası Dental Travmatoloji Derneği) protokollerine göre izlenmesi gereken yol şöyledir:

### 1. Klinik ve Radyografik Değerlendirme

Öncelikle bölge serum fizyolojik ile temizlenmeli ve dişin pozisyonu radyografilerle (periapikal ve gerekirse oklüzal) kontrol edilmelidir. Komşu dişlerde veya alveolar sokette bir kırık olup olmadığı saptanmalıdır.

### 2. Dişin Yeniden Konumlandırılması (Repozisyon)

Diş olay yerinde hemen replante edildiği için PDL hücreleri büyük oranda canlıdır. Ancak hatalı pozisyonu düzeltmek için:

* Lokal anestezi altında diş nazikçe, hafif parmak basıncıyla soketinden **doğru anatomik pozisyonuna** getirilmelidir.

* Olayın üzerinden sadece 2 saat geçtiği için pıhtı henüz tam organize olmamıştır; bu nedenle repozisyon genellikle kolayca yapılabilir.

### 3. Stabilizasyon (Splintleme)

Doğru pozisyon sağlandıktan sonra dişin sabitlenmesi gerekir:

* **Esnek (fleksibl) splint** (örneğin 0.016 inç paslanmaz çelik tel ve kompozit) uygulanmalıdır.

* Splintleme süresi genellikle **2 hafta** olarak önerilir.

### 4. Endodontik Yaklaşım (En Kritik Karar)

8 yaşındaki bir çocukta 11 numaralı dişin kök gelişimi muhtemelen tamamlanmamıştır (**açık apeks**). Bu durum tedavi seyrini değiştirir:

* **Açık Apeks (Kök gelişimi süren diş):** Hemen kanal tedavisi **yapılmaz**. Amaç, pulpanın revaskülarize (yeniden damarlanma) olmasını beklemektir. Hasta klinik ve radyografik olarak çok sıkı takip edilir. Eğer pulpada nekroz, enfeksiyon veya kök rezorpsiyonu belirtileri görülürse kanal tedavisine (apeksifikasyon veya rejeneratif prosedürler) o zaman başlanır.

* **Kapalı Apeks:** Eğer kök gelişimi tamamlanmışsa, replantasyondan sonraki 7-10 gün içinde kanal tedavisine başlanmalıdır.

### 5. Destekleyici Tedaviler ve Öneriler

* **Antibiyotik:** Hastanın yaşı ve kilosu dikkate alınarak sistemik antibiyotik (genellikle Amoksisilin) reçete edilmelidir.

* **Tetanoz:** Hastanın tetanoz aşı durumu sorgulanmalı, gerekirse profilaksi için yönlendirilmelidir.

* **Ağız Hijyeni:** Yumuşak bir diş fırçasıyla fırçalama ve %0,12'lik Klorheksidin gargaralar önerilir.

* **Diyet:** İlk 2 hafta yumuşak gıdalarla beslenmesi söylenmelidir.

### 6. Takip Takvimi

Dişin prognozu için şu periyotlarda kontrol şarttır: 2. hafta (splint çıkarılması), 4. hafta, 3. ay, 6. ay, 1. yıl ve ardından 5 yıl boyunca yıllık kontroller. Her kontrolde radyografi alınarak kök rezorpsiyonu (iltihabi veya replasman rezorpsiyonu) olup olmadığı izlenmelidir.

---

**Özetle:** Dişi nazikçe doğru pozisyonuna çekip esnek bir splint ile sabitlemeli, açık apeks durumunda pulpayı izlemeli ve sistemik antibiyotik desteği sağlamalısınız.

Bu vaka için **radyografik görüntüleri inceleyerek kök ucunun (apeksin) açıklık durumunu netleştirmemi ister misiniz?** Karar mekanizmasını en çok bu bilgi etkileyecektir.

**Evaluator Note:** *Hatalı replante immatür dişte repozisyon, 2 hafta splint ve revaskülarizasyon takibi doğru; antibiyotik yaş uyumu belirtilmiş.*

**Claude**

**English Response | Score: 4.487**

Given this clinical scenario, here's the appropriate treatment protocol:

## Immediate Management

**1. Reposition the tooth correctly**

- Remove the tooth carefully from its incorrect position

- Clean the socket gently with saline if needed (avoid curetting the socket)

- Reposition the tooth into its correct anatomical position using gentle digital pressure

- Verify proper positioning clinically and radiographically

**2. Splinting**

- Apply a flexible splint (0.016-0.018 inch stainless steel wire or similar) to stabilize the tooth

- The splint should be semi-rigid/flexible to allow physiologic movement

- Bond to adjacent teeth (typically one tooth on each side)

- Splint duration: **2 weeks** for an uncomplicated replantation case like this

**3. Verify occlusion**

- Ensure the repositioned tooth is not in traumatic occlusion

- Adjust if there's premature contact

## Systemic Considerations

- **Tetanus prophylaxis**: Verify immunization status and update if needed

- **Antibiotics**: Consider systemic antibiotics (doxycycline if age-appropriate, or penicillin/amoxicillin) for 7 days to reduce risk of infection and inflammatory resorption

- **Pain management**: Prescribe appropriate analgesics (ibuprofen is preferred)

## Root Canal Treatment

Since this tooth was extraoral and then incorrectly positioned:

- **Initiate endodontic treatment within 7-10 days** (before splint removal or shortly after)

- The extended extraoral time and manipulation increase necrosis risk

- Place calcium hydroxide as an intracanal medicament

- Complete root canal treatment with permanent obturation once apex development confirms (this tooth likely has an open apex at age 8)

## Follow-up Protocol

- **2 weeks**: Remove splint, evaluate healing

- **6-8 weeks, 3 months, 6 months, 1 year, then annually for 5 years**: Monitor for complications (resorption, ankylosis, infection)

- Radiographic monitoring is essential to detect root resorption early

The prognosis depends on the extraoral time and handling, but immediate replantation gives this tooth a reasonable chance for long-term survival.

**Evaluator Note:** *Hatalı replante immatür dişte repozisyon ve 2 hafta splint doğru; ancak IADT'de immatür dişte KKT 7-10 gün yerine nekroz belirtisi beklenmelidir.*

**Turkish Response | Score: 4.088**

8 yaşındaki hastada 11 numaralı daimi santral dişin avülsiyonu ve yanlış pozisyonda replantasyonu durumunda tedavi protokolü şöyle olmalıdır:

## Acil Müdahale

**Dişin yeniden pozisyonlandırılması**: Lokal anestezi altında dişi dikkatle çıkarıp doğru anatomik pozisyonda yeniden yerleştirmelisiniz. Ekstra-oral kuru kalma süresi kısa olduğu için (olay yerinde hemen replante edilmiş) prognozu daha iyidir.

**Kök yüzey tedavisi**: Dişi çıkarırken periodontal ligament hücrelerine zarar vermemek için dikkatli olunmalıdır. Ancak 2 saat geçtiği için PDL hücreleri kısmen canlılığını yitirmiş olabilir. Kök yüzeyi nazikçe salin veya Hank's solüsyonu ile yıkanmalıdır.

## Endodontik Yaklaşım

8 yaşındaki hastada apeks henüz kapanmamış olabilir. Bu durumda:

- Eğer apeks açıksa: Revaskularizasyon potansiyeli olduğu için pulpal iyileşme izlenebilir, ancak 2 saat geçtiği için bu olasılık düşüktür

- Genellikle 7-10 gün içinde kalsiyum hidroksit ile ekstrakanal tedaviye başlanmalıdır

- Eğer apeks kapanmışsa: standart endodontik tedavi planlanır

## Splintleme

Esnek splint (kompozit-rezin tel veya esnek wire) ile 2 hafta süreyle splintleme yapılmalıdır. Fizyolojik hareketlere izin veren esnek splint tercih edilmelidir.

## Antibiyotik ve Aşı Kontrolü

- Sistemik antibiyotik (doksisiklin veya penisilin) 1 hafta süreyle

- Tetanoz aşı durumu sorgulanmalı ve gerekirse takviye yapılmalıdır

## Takip

Düzenli radyolojik ve klinik kontroller (1, 3, 6, 12 ay) ile replasif rezorpsiyon ve ankiloz açısından izlem yapılmalıdır.

**Evaluator Note:** *Hatalı replante immatür dişte repozisyon ve 2 hafta splint doğru; ancak IADT immatür dişte KKT 7-10 gün yerine nekroz belirtisi beklenmelidir.*

**SCENARIO 21:** Avulsion - Mature Tooth, Extended Dry Time (>60 min)

**ChatGPT**

**English Response | Score: 5.000**

**Clinical scenario:** Avulsed *permanent* maxillary central incisor (#11) in an 18-year-old, stored in milk, extra-oral time ≈ 40 minutes → **favorable prognosis for replantation**.

### Recommended treatment protocol (IADT-based)

1. **Immediate management**

* Administer **local anesthesia**.

* **Gently rinse the root surface** with sterile saline (do **not** scrub or scrape the PDL).

* **Irrigate the socket** with saline; do not curette.

* **Replant the tooth immediately** with gentle finger pressure.

* Verify position clinically and radiographically.

2. **Stabilization**

* Apply a **flexible (semi-rigid) splint** for **2 weeks**.

3. **Medications & adjuncts**

* **Systemic antibiotics**

* First choice: **Doxycycline** (if not contraindicated)

* Alternative: **Amoxicillin**

* **Check tetanus status** and update if needed.

* **Chlorhexidine 0.12% mouth rinse** twice daily for 1 week.

* Soft diet, meticulous oral hygiene, avoid biting on the tooth.

4. **Endodontic management**

* Tooth has a **closed apex** → **initiate root canal therapy 7–10 days after replantation**.

* Place **calcium hydroxide** as an intracanal medicament.

* Definitive obturation after signs of periodontal healing (usually weeks later).

5. **Follow-up**

* Clinical and radiographic review at **2 weeks (splint removal), 4 weeks, 3 months, 6 months, and annually** to monitor for resorption or ankylosis.

**Key point:** Because the tooth was stored in milk and replanted within 60 minutes, **replantation with delayed endodontic therapy is the correct and standard approach**.

**Evaluator Note:** *Matür diş avülsyonu protokolü eksiksiz; 2 hafta splint, antibiyotik, 7-10 gün KKT IADT uyumlu.*

**Turkish Response | Score: 4.563**

Bu olgu **kalıcı diş avülsiyonu** olup; hasta yaşı (18), **ekstraalveoler süre (~40 dk)** ve **saklama ortamı (süt)** nedeniyle **prognozu görece iyi** kabul edilir. Tedavi amacı dişin **replantasyonu ve periodontal iyileşmenin maksimize edilmesidir**.

Aşağıda **güncel kabul gören protokol** özetlenmiştir:

---

## 1. İlk değerlendirme

* **Genel durum ve travma öyküsü** (bilinç kaybı, diğer yaralanmalar).

* **Tetanos durumu** sorgulanır.

* Klinik ve **periapikal radyografi** ile alveol soketi ve komşu dişler değerlendirilir.

---

## 2. Dişin değerlendirilmesi ve hazırlanması

* Diş **kronundan tutulur**, kök yüzeyine temas edilmez.

* Süt ile nazikçe yıkanır; **kazıma, fırçalama veya dezenfeksiyon yapılmaz**.

* Ekstraalveoler süre <60 dk ve uygun ortamda saklandığı için **PDL hücreleri canlı kabul edilir**.

---

## 3. Alveol soketinin hazırlanması

* Soket **serum fizyolojik ile nazikçe irrige edilir**.

* **Küretaj yapılmaz** (pıhtı ve PDL kalıntıları korunur).

* Alveol duvarlarında fraktür varsa düzeltilir.

---

## 4. Replantasyon

* Lokal anestezi altında diş **nazikçe sokete replante edilir**.

* Doğru pozisyon klinik ve radyografik olarak kontrol edilir.

* Hasta **gazlı bez üzerinde ısırılarak** diş stabilize edilir.

---

## 5. Splintleme

* **Esnek (semi-rigid) splint** uygulanır (tel + kompozit veya fiber splint).

* **Süre: 2 hafta**

* Alveol fraktürü varsa: 4 hafta.

---

## 6. İlaç tedavisi

* **Sistemik antibiyotik**

* Tercihen:

* *Amoksisilin* (erişkin dozunda)

* Penisilin alerjisinde: *Doksisiklin* (18 yaş uygun)

* **Ağız hijyeni**

* %0,12 klorheksidin gargara (7–10 gün)

* **Tetanos profilaksisi**

* Gerekiyorsa tıbbi konsültasyon.

---

## 7. Endodontik tedavi

* 18 yaş → **apeks kapalı**

* **Kanal tedavisi replantasyondan 7–10 gün sonra**, splint üzerindeyken yapılır.

* Amaç: **inflamatuvar kök rezorpsiyonunu önlemek**

* Kalsiyum hidroksit ara pansumanı tercih edilebilir.

---

## 8. Hasta bilgilendirmesi ve takip

* İlk 2 hafta:

* Yumuşak diyet

* Dişi zorlayıcı fonksiyonlardan kaçınma

* **Takip zamanları**

* 2 hafta (splintin çıkarılması)

* 4 hafta

* 3 ay

* 6 ay

* 1 yıl ve sonrası (ankiloz/rezorpsiyon açısından)

---

## Beklenen komplikasyonlar

* **İnflamatuvar kök rezorpsiyonu**

* **Yer değiştirme (ankiloz) rezorpsiyonu**

* Uzun dönem prognoz: dikkatli takip gerektirir.

---

İstersen, bu vakayı **IADT (International Association of Dental Traumatology) kılavuzuna göre şematik akış halinde** veya **sınav cevabı formatında** da düzenleyebilirim.

**Evaluator Note:** *Matür diş avülsiyonu protokolü eksiksiz; 2 hafta splint, antibiyotik, 7-10 gün KKT IADT uyumlu.*

**Gemini**

**English Response | Score: 4.912**

This is a clinical emergency, but the prognosis is **favorable** because the tooth was stored in an appropriate medium (milk) and the extra-oral time is under 60 minutes. This means the periodontal ligament (PDL) cells are likely still viable.

Based on the **IADT (International Association of Dental Traumatology)** guidelines, here is the treatment protocol for a permanent tooth with a closed apex (standard for an 18-year-old) that has been extra-oral for minutes.

---

### 1. Immediate Preparation

* **Handle with care:** Hold the tooth by the crown only. Do not touch or scrub the root, as this will damage the viable PDL cells.

* **Clean the tooth:** If there is visible contamination, rinse it gently with cold running water or saline for 10 seconds. Since it was in milk, it may not need further rinsing.

* **Prepare the socket:** Use a gentle stream of saline to remove any blood clots from the socket. Do not curette the socket walls.

### 2. Replantation

* **Positioning:** Replant the tooth into the socket using light digital pressure.

* **Verification:** Ensure it is aligned correctly with the neighboring teeth. Ask the patient to gently bite on a piece of gauze to hold it in place.

### 3. Stabilization (Splinting)

* **Type:** Apply a **flexible splint** (such as a stainless steel wire up to 0.4 mm or high-test fishing line bonded with composite).

* **Duration:** Keep the splint in place for **2 weeks**.

* **Purpose:** A flexible splint allows for physiological micro-movement, which helps prevent dentoalveolar ankylosis (the tooth fusing to the bone).

### 4. Systemic and Adjunctive Therapy

* **Antibiotics:** Prescribe a systemic antibiotic to prevent infection during the healing phase.

* *Standard:* **Amoxicillin** or **Penicillin V**.

* *Alternative (if allergic):* Doxycycline (though usually reserved for older patients, an 18-year-old can take it).

* **Tetanus:** Verify the patient's tetanus vaccination status. If it’s been more than 5 years since their last booster, refer them to a physician for a booster within 48 hours.

* **Chlorhexidine:** Recommend rinsing with 0.12% Chlorhexidine gluconate twice daily for one week to maintain oral hygiene while the area is tender.

### 5. Endodontic (Root Canal) Treatment

Because the patient is 18, the tooth almost certainly has a **closed apex**.

* **Timing:** Root canal therapy (RCT) should be initiated **7–10 days** after replantation.

* **Reasoning:** The pulp is necrotic. Starting RCT before the splint is removed (but after initial healing) prevents the necrotic pulp from triggering inflammatory root resorption.

* **Medication:** Use calcium hydroxide as an intracanal medicament for 2 weeks before final obturation.

### 6. Follow-Up Schedule

The tooth must be monitored clinically and radiographically at the following intervals:

* 2 weeks (Splint removal and clinical exam).

* 4 weeks.

* 3 months.

* 6 months.

* 1 year, and then annually for 5 years.

---

### Patient Instructions

Advise the patient to stick to a **soft diet** for up to 2 weeks and to brush with a soft toothbrush after every meal to keep the site clean.

**Would you like me to outline the specific radiographic signs to look for during the follow-up appointments to identify early resorption?**

**Evaluator Note:** *Matür diş avülsiyonu protokolü eksiksiz; 2 hafta splint, antibiyotik, 7-10 gün KKT IADT uyumlu.*

**Turkish Response | Score: 4.813**

18 yaşındaki bir hastada 11 numaralı dişin (üst sağ orta kesici) avülse olması acil bir dental durumdur. Dişin süt içinde korunmuş olması ve 40 dakika içinde kliniğe ulaşması, **periodontal ligament (PDL) hücrelerinin canlılığı** açısından oldukça umut verici bir tablodur.

IADT (Uluslararası Dental Travmatoloji Derneği) güncel kılavuzlarına göre bu vakadaki tedavi protokolü şu şekilde olmalıdır:

### 1. Hazırlık ve Replantasyon

Dişin dış ortamda geçirdiği süre 60 dakikadan az olduğu ve uygun bir solüsyonda (süt) saklandığı için hedef, PDL hücrelerini koruyarak dişi hemen yerine yerleştirmektir.

* **Dişin Hazırlanması:** Dişi sadece kuron kısmından tutun. Kök yüzeyine dokunmayın. Dişi soğuk serum fizyolojik (salin) ile nazikçe durulayarak üzerindeki kalıntıları uzaklaştırın.

* **Soket Hazırlığı:** Soketi serum fizyolojik ile nazikçe irrige edin. Pıhtı varsa uzaklaştırın ancak **soket duvarlarını asla küretlemeyin.**

* **Replantasyon:** Dişi hafif parmak basıncıyla yavaşça soketine yerleştirin.

### 2. Splintleme (Sabitleme)

* **Tür:** Esnek (fleksibil) bir splint kullanılmalıdır (Örn: 0.4 mm paslanmaz çelik tel veya olta misinası + kompozit).

* **Süre:** Dişin fizyolojik hareketine izin vermek ve ankiloz riskini azaltmak için splint **2 hafta** boyunca ağızda kalmalıdır.

### 3. Endodontik Tedavi (Kanal Tedavisi)

18 yaşındaki bir hastada 11 numaralı dişin **apeksi kapalıdır.** Kapalı apeksli dişlerde pulpanın (sinirin) kendini yenileme şansı yoktur ve nekroz kaçınılmazdır.

* **Zamanlama:** Kök rezorpsiyonunu (iltihabi erime) önlemek için kanal tedavisine replantasyondan sonraki **7-10 gün içinde** (splint çıkarılmadan hemen önce veya çıkarıldığı gün) başlanmalıdır.

* **Prosedür:** Pulpa ekstirpe edilir ve geçici olarak **kalsiyum hidroksit** yerleştirilir. Kalıcı kanal dolgusu genellikle 1 ay sonra, semptom yoksa yapılır.

### 4. İlaç Tedavisi ve Öneriler

* **Antibiyotik:** Hastanın yaşı ve kilosu göz önüne alınarak sistemik antibiyotik (genellikle Doksisiklin veya Amoksisilin) reçete edilmelidir.

* **Tetanos:** Hastanın tetanos aşısı durumu sorgulanmalı, gerekirse bir üst merkeze sevk edilmelidir.

* **Ağız Hijyeni:** Yumuşak bir diş fırçası kullanımı ve %0.12'lik klorheksidin gargara (günde 2 kez, 1 hafta) önerilir.

* **Diyet:** İlk 2 hafta yumuşak gıdalarla beslenilmeli, ön dişle ısırma yapılmamalıdır.

---

### Takip Çizelgesi

Başarılı bir iyileşme için hastanın düzenli takibi şarttır:

* 2. hafta (splint çıkarılması ve klinik kontrol)

* 4. hafta

* 3. ay

* 6. ay

* 1. yıl ve sonrasında her yıl.

> **Önemli Not:** Eğer dişte aşırı mobilite veya enfeksiyon belirtisi yoksa, splint süresini 2 haftadan fazla uzatmamaya dikkat edilmelidir; aksi takdirde dişin kemikle kaynaması (ankiloz) riski artar.

Bu vakayla ilgili olarak, hastanın **radyografik görüntülerini (PA veya panoramik)** inceleyip alveol kemiğinde bir kırık olup olmadığını kontrol etmemi ya da hastaya vereceğiniz **reçete detaylarını** hazırlamamı ister misiniz?

**Evaluator Note:** *Matür dişte sütte saklama (<60dk) protokolü tam, 2 hafta splint ve 7-10 gün KKT zamanlaması IADT uyumlu.*

**Claude**

**English Response | Score: 4.537**

For an avulsed permanent tooth in an 18-year-old with favorable conditions (stored in milk, <40 minutes extra-oral time), the treatment protocol should be:

## Immediate Management

**Tooth Preparation:**

- Gently rinse the tooth with saline or milk for 10 seconds

- Do NOT scrub or touch the root surface

- Keep the tooth moist at all times

**Replantation Procedure:**

- Administer local anesthesia

- Gently irrigate the socket with saline (do not curet)

- Reposition the tooth slowly with gentle digital pressure

- Verify position clinically and radiographically

## Stabilization

Apply a **flexible splint** for 2 weeks:

- Use a semi-rigid splint (acid-etch composite and wire or fiber)

- Splint to adjacent teeth on either side

- Allow physiologic mobility

## Endodontic Treatment

For a mature tooth with closed apex (appropriate for 18-year-old):

- Initiate root canal treatment 7-10 days after replantation, or before splint removal

- This helps prevent inflammatory root resorption

## Medications

- **Antibiotics**: Doxycycline 100mg (or amoxicillin if contraindicated) for 7 days

- **Analgesics**: As needed

- **Tetanus prophylaxis**: If not current

## Follow-up Schedule

- 1 week, 2 weeks (splint removal), 4 weeks, 3 months, 6 months, 1 year, then annually for 5 years

- Monitor for: root resorption (replacement/inflammatory), pulp necrosis, ankylosis

The favorable storage conditions and short extra-oral time give this tooth a good prognosis if managed properly.

**Evaluator Note:** *Matür dişte sütte saklama (<60dk) protokolü tam, 2 hafta splint ve 7-10 gün KKT zamanlaması IADT uyumlu.*

**Turkish Response | Score: 4.713**

Avülse 11 numaralı dişin (üst santral kesici) tedavi protokolü şöyle olmalıdır:

## Acil Müdahale

**Ekstraoral dönem değerlendirmesi:**

- Diş 40 dakikada, süt gibi uygun bir ortamda saklanmış (iyi prognoz)

- Kök gelişimi: 18 yaşında apikal gelişim tamamlanmış

- Periodontal ligament canlılığı muhtemelen korunmuş

**Replantasyon işlemi:**

1. **Sokete müdahale:** Soket fizyolojik salin ile nazikçe irrige edilir, pıhtı temizlenir ama soket duvarına müdahale edilmez

2. **Dişin hazırlanması:**

- Kök yüzeyine dokunulmaz

- Sadece koronal kısımdan tutulur

- Salin ile yıkanır

- Kök yüzeyi kurutulmaz

3. **Replantasyon:** Diş sokete nazikçe yerleştirilir, parmak basıncı ile yerine oturtulur

## Splintleme

- **Fleksible splint** uygulanır (kompozit-tel veya fiber)

- **Süre:** 2 hafta (kök rezorpsiyonu riskini azaltmak için kısa süre)

- Diş fizyolojik hareketine izin verecek şekilde hafifçe sabitlenir

## Medikal tedavi

- **Tetanoz profilaksisi** kontrol edilir

- **Antibiyotik:** Doksisiklin 100 mg 2x1, 7 gün (veya amoksisilin alternatif olabilir)

- **Ağrı kesici:** İbuprofen gibi NSAİD

## Endodontik tedavi

Kapalı apeksli dişte:

- **Kök kanal tedavisi 7-10 gün içinde başlanır**

- Splint çıkarılmadan önce veya hemen sonrasında

- Kalsiyum hidroksit ile geçici dolgu

- Daha sonra kalıcı kanal dolgusu yapılır

## Takip protokolü

- 1 hafta, 2 hafta (splint çıkarma)

- 1, 3, 6, 12 ay ve sonrasında yıllık

- Her kontrolde: radyografi, perküsyon testi, vitalite testleri

- **İzlenecek komplikasyonlar:** Eksternal rezorpsiyon (inflamatuar, replacement), pulpa nekrozu, ankiloz

## Önemli noktlar

Ekstraoral kuru süre <60 dakika ve uygun saklama ortamında olduğu için **prognoz nispeten iyi**. Ancak periodontal ligament hasarı ve rezorpsiyon riski her zaman vardır. Hasta bu komplikasyonlar hakkında bilgilendirilmelidir.

**Evaluator Note:** *Matür dişte sütte saklama (<60dk) protokolü tam, 2 hafta splint ve 7-10 gün KKT zamanlaması IADT uyumlu.*

**Summary: Response Characteristics**

| **Model** | **Language** | **Avg Length** | **Min** | **Max** |
| --- | --- | --- | --- | --- |
| ChatGPT | English | 1499 | 745 | 2396 |
| ChatGPT | Turkish | 1833 | 776 | 2645 |
| Gemini | English | 2986 | 2185 | 3905 |
| Gemini | Turkish | 2762 | 2069 | 3374 |
| Claude | English | 1778 | 1478 | 2218 |
| Claude | Turkish | 1806 | 1156 | 2877 |

*Note: Length measured in characters including spaces and formatting.*
